# Supplementary material for: GRQA: Global River Water Quality Archive
Source: Copernicus journal article supplement (doi:10.5194/essd-2021-51), 2021-03-02
Supplement: Supplementary file [file essd-2021-51-AC2-supplement.pdf]

Reply letter to the second review of the preprint submitted to Earth System Science Data (ESSD) entitled: "GRQA: Global River Water Quality Archive".

The authors' answers marked bold are given below the reviewer's comments. The updated version of the paper with **changes highlighted in yellow** can be found at the end of the document.

### **General comments**

Virro et al. describe aggregating and harmonizing five national, continental and global datasets that can be used for global water quality models. Among the five selected datasets the GEMSTAT itself is a global database containing harmonized data from the contributing countries. The authors follow the ETL approach (Extract-Transform-Load) to bring the different data sets together. The methods are well described and data, metadata and scripts are available at the given websites. The authors suggest in their conclusions to transform the set of CSV files to a relational database in future what would further improve the usability of this dataset. I encourage the authors to do it. Also I like the idea to develop an online dashboard for GRQA. From a global modelers perspective the derived GRQA can be easily used. The authors selected 42 specific parameter relevant for modelling nutrients (water temperature, oxygen, nitrogen, phosphorous, carbon compounds ...). Still, GRQA cannot solve the problem of data scarcity in Africa, Asia and South America and also the suggested machine learning cannot help here.

In general, the paper is well written and supports the publishing of GRQA. One issue for me is that it was not mentioned that WATERBASE is already integrated in GEMSTAT and how the authors dealt with this. There must be a lot of duplicate data from this fact. But the given procedures should have found all the doubled data.

I support the publication of this paper. Some minor issues are listed below.

**Answer:** Thank you for the supportive opinion! Indeed, the GRQA cannot solve the problem of data scarcity in Africa, Asia and South America but is only one step towards this. We have now specified that encouraging the uptake of open data policies by institutions collecting water quality data would still be the main way of improving the spatiotemporal coverage, rather than ML methods (line 375-376 & 381-383). This paper will provide a base database to complement, but also the guideline how new water quality datasets should be created so that they can be most efficiently used with modern data science methods and ML. See response regarding WATERBASE vs GEMSTAT below.

In addition, we included an extensive data catalog with maps showing the spatiotemporal coverage and graphs describing the distribution of all 42 parameters as supplementary material of the paper. The data catalog can be viewed at <https://drive.google.com/file/d/1UvI5tmeXff4Fwgard5xt0hI9SIh2rdra/view?usp=sharing>.

### **Specific comments**

line 55: please list the parameter used here "most important water quality parameters" or refer to your table 7

**Answer:** We added a reference to Table 7 (line 65).

line 71: "... only eight parameter matched the data set" – you mean one of the 42 selected parameters? Pls clarify.

**Answer:** We meant that out of the total selection of parameters included in GRQA only eight were available in CESI. The wording was poor on our part, so that has now been fixed (line 82-83).

line 73 – 74: please give this numbers (how many parameter matched the set, site count range, mean time series length per site, average number of observations per site) for all data sets in a table and refer only to the parameters that were used

**Answer:** Thank you for the suggestion. We updated the table with this information (Table 1).

line 99: "WATERBASE has the shortest timeseries ... 2008 - 2018" - as far as I remember there are nutrient data available starting with 1992; please check again the disaggregated data; e.g. see the graphs given under this link <https://www.eea.europa.eu/data-and-maps/daviz/rivers-nutrient-trend-4#tabdashboard-01> The graph is based on data from WATERBASE.

**Answer:** The time period shown for WATERBASE in our paper refers to the time series length of the 15 parameters that were extracted and included in GRQA. For these parameters the earliest observations are from 2008.

line 125: "introduction: nutrients, carbon, sediments and oxygen"-Please refer to table 7 here.

**Answer:** Reference now added (line 141).

line 217: I understood that WATERBASE was included into GEMSTAT; please see <https://www.waterandchange.org/en/european-water-quality-monitoring-data-in-gemstat-databaseundergoes-major-update/>  
Also here the time frame is given with 49 years for WATERBASE; please check and write a short paragraph how you dealt with this issue.

**Answer:** A valid remark. We became aware of the inclusion of WATERBASE into GEMSTAT some time after we had started working on compiling GRQA. However, only sites with more than three years of data were included in this update. As mean time series length per site was only 1.4 years in WATERBASE, a significant number of sites were left out, which is why we decided to include WATERBASE separately in GRQA. Although it is likely that there were many observations, which appeared both in GEMSTAT and WATERBASE, the duplicate detection procedure we implemented should have identified WATERBASE observations also appearing in GEMSTAT. We added an explanation about WATERBASE inclusion in line 112-117.

The time frame given for WATERBASE in our paper refers to the time series length of the 15 parameters that were extracted and included in GRQA, as mentioned in a previous comment.

Figure 2: Why is the percentage of observations (1898 - 1970) not given her? If no data exist before 1970 it should be mentioned here. The colors in the legend don't correspond to the colors in the plot. E.g., I can only guess what dark green is. Also I wonder what I can learn from this plot. Maybe the authors change this plot and show the time series available per continent instead. That is actually where I'm interested in as global modeler.

**Answer:** Only seven observations (0.0000169%) existed for DOC in the 1968–1970 period, so the number seemed to get lost due to rounding. We added this detail under the plot. We also changed the design of the plot to a more clear line plot. This figure was meant to show the temporal distribution of values per source, since depending on the dataset the distribution is different. For example, GEMSTAT has more observations from the more recent time period, while WQP contains quite a lot of data also from the earlier years, which can be important to know when studying long term trends.

Unfortunately, we were not able to produce the continental distribution plots due to that information not being available in the source data. This was specifically an issue with GEMSTAT and GLORICH, since in the case of CESI, WATERBASE and WQP the continent can be assumed to be the same for all sites. As not all observations had country of origin reported in GEMSTAT and GLORICH, they could not be linked to a specific continent and more complex spatial queries would have been needed to generate continental statistics. However, we added extensive data catalogue as an appendix with graphs and maps for temporal and spatial coverage of every variable. This should help potential users to get a better overview of the data before downloading it.

line 222-228: I wonder how can the same station be reported to different databases with different position information? In case it is the same station then both stations should contain the same time series? And how are you dealing with stations that are very dense (<1km) but not the same? For example at a tributary that is going parallel and there is one station in the tributary and one in the main stream before tributary is coming in. Did you find such cases and how did you deal with it?

**Answer:** These cases could be due to differences in rounding of coordinates or when a station's location has shifted over time, so that it appears in another dataset under a different ID and slightly different coordinates. Indeed, those station pairs should have the same observation values, so they would be detected by the RMSE calculation procedure and collected to the corresponding metadata file (\*\_dup\_obs.csv).

Regarding nearby stations, which are actually independent. For these stations, the second stage of duplication detection (RMSE calculation) should have identified them as separate time series, because only cases where RMSE=0 were flagged as potential duplicates. There were also stations that were closer than 1 km within the same source dataset, but we considered those stations to have been validated by the corresponding institutions (e.g. ICWRGC in the case of GEMSTAT). We also checked some of these nearby stations present within the same source data and based on the location and metadata (e.g. station name/description) it seemed like they had been placed there for a reason, e.g. to monitor water quality both upstream and downstream from a town or facility. Therefore, we decided to apply the duplication detection procedure only to stations from different source datasets.

line 296-297: It is not clear to me why the IQR test outliers are removed from the plot? For illustrative purpose – what does it mean? The plots would not look much different wouldn't they? So the outliers are not shown or are removed from the data? And actually for TSS the outliers can be really data e.g. before the crest of a flood or at the beginning of discharge reach a region specific threshold TSS can get extraordinary values.

**Answer:** As mentioned in section 3.2 *Outlier flagging*, no outliers were removed from the GRQA and a column indicating their status was added instead. However, including them in the plot would have seriously affected the visibility of the rest of the data points due to the

extreme skewness. The skewness of the data can be seen when examining the maximum values given in the summary statistics (*\*\_processed\_stats.csv*) found in the metadata, where in some cases the maximum value of a parameter exceeded that of the median by several orders of magnitude. It is likely that the most extreme outliers are caused by data entry errors (incorrect unit, e.g. reported in µg/l instead of mg/l etc) or equipment malfunction. Regarding TSS, it is true that in certain instances the concentration can be significantly greater than the median value, but similar to other parameters, there were some extremely high values, which would have affected the illustration. For example, in the case of TSS values in WQP (*WQP\_processed\_stats.csv*) the maximum (7700 mg/l) greatly exceeded the median (7.6 mg/l) as well.

Figure 4: e.g. TSS – 18.9% outliers removed from the plot – this 18.9% refers to all data? So it could be that 18% outliers are in GEMSTAT and the rest in the other datasets? Do I understand it right? please clarify in the figure text.

**Answer:** Yes, the percentage of outliers refers to the whole dataset. As the same percentage of outliers per parameter is given in Table 7, we did not feel the need to specify that again here and instead added a reference to Table 7 under this figure.

line 307 – 313: Please delete this paragraph. The focus of this paper is on merging data together rather than assessing the content. Therefore I would remove lines starting with “DOC concentrations are lower ...” and ending with “point sources”. Even if Figure 7 is interesting from the content perspective I would remove it from this paper because it is not the main focus. In my opinion it is sufficient to mention that this kind of plots are available for all 42 parameters in the GRQA dataset.

**Answer:** We removed this part and moved the example plot to the appendix (Fig. A2).

line 320: What do the authors mean by “using the wrong form”? This is not clear to me. You should have checked the forms before using it in your codes and I’m sure you did. So how can it happen that a wrong form was used? Please explain.

**Answer:** Please see the next answer.

line 322: Why are units in GLORICH in µg/l a problem during conversion process? The authors transformed it to mg/l. I cannot see a problem here. Please clarify the discussion.

**Answer:** This was poor wording on our part. As mentioned in section 3 *Unit conversion*, not all parameters in source data had information about in which form (e.g. NO<sub>3</sub> vs N) they were reported available, so assumptions had to be made about the chemical form when converting the units using the molecular mass. We did try to find additional information about these missing forms from proxy sources, e.g. in the case of GLORICH another dataset, where the author of GLORICH was involved with and that had metadata about the chemical forms available (Börker et al., 2020). These references have been included in the *form\_ref* column in corresponding lookup tables (*\*\_code\_map.csv*) used during the harmonization stage. However, if the assumption made based on this limited ancillary information was incorrect then the conversion would have been affected as well. We have now added this explanation to the unit conversion description (line 160-162) and fixed the wording in line 340-341.

line 352: I doubt that ML methods alone can help to fill the gaps in Africa and Asia without support of any measurements in the regions. So, the argument given in line 359

contradicts the statement given in line 352. Maybe a combination of remote sensing techniques and water quality modelling (including ML) could help. Please revise.

**Answer:** We agree that increased measures for encouraging countries to publish their data in accordance with open data standards is still the best option when improving the spatial coverage of data. We changed this section, so that potential ML methods refer specifically to filling temporal gaps in time series, rather than spatial.

line 380: "The dataset is expected to have yearly updates after publishing" – are you sure that this is realistic? I would rather advise to remove this sentence. It is not necessary to state something like this in a paper, you can just do it if the capacity is available.

**Answer:** Valid remark. We removed this sentence as it is unknown if it will be viable.

line 383 – 384: I like very much the idea to put GRQA in a database and to make it accessible via an online dashboard.

**Answer:** Thank you for the comment. We will consider some options to improve the usability and have added some potential options to the conclusions (line 405-411).

#### **Technical corrections**

line 268: table reference is missing

**Answer:** Thank you for pointing that out. We have fixed it now (line 293).

line 269: given numbers of sites per parameter ("15 (POP) up to 90792 (pH)") don't correspondent with the numbers given in Table 7. Please clarify.

**Answer:** Thank you for pointing that out. These were likely placeholder values from some earlier version that are now fixed (line 294).

line 312: reference is missing

**Answer:** As we removed this section, this missing reference has also been removed.

#### **References added to the paper:**

Börker, J., Hartmann, J., Amann, T., Romero-Mujalli, G., Moosdorf, N., and Jenkins, C.: Chemical river data from drained loess areas, PANGAEA, <https://doi.org/10.1594/PANGAEA.915784>, <https://doi.org/10.1594/PANGAEA.915784>, in: Börker, J et al. (2020): Chemical weathering of loess - GIS data, alkalinity measurements of a loess column experiment in the laboratory under pCO<sub>2</sub> atmospheric and saturated conditions and chemical river data from drained loess areas. PANGAEA, <https://doi.org/10.1594/PANGAEA.915793>, 2020.

# GRQA: Global River Water Quality Archive

Holger Virro<sup>1</sup>, Giuseppe Amatulli<sup>2,3</sup>, Alexander Kmoch<sup>1</sup>, Longzhu Shen<sup>4,5</sup>, and Evelyn Uuemaa<sup>1</sup>

<sup>1</sup>Department of Geography, Institute of Ecology and Earth Sciences, University of Tartu, Vanemuise 46, Tartu, 51003, Estonia

<sup>2</sup>Yale University, School of the Environment, New Haven, CT, 06511, USA

<sup>3</sup>Yale University, Center for Research Computing, New Haven, CT, 06511, USA

<sup>4</sup>HyperAmp, Barnwell Road, Cambridge CB5 8RQ, UK

<sup>5</sup>Spatial-Ecology, Meaderville House, Wheal Buller, Redruth, TR16 6ST, UK

**Correspondence:** Holger Virro (holger.virro@ut.ee)

**Abstract.** Large-scale hydrological studies are often limited by the lack of available observation data with a good spatiotemporal coverage. This has affected the reproducibility of previous studies and the potential improvement of existing hydrological models. In addition to the observation data itself, insufficient or poor quality metadata has also discouraged researchers to integrate the already available datasets. Therefore, improving both, the availability, and quality of open water quality data would increase the potential to implement predictive modeling on a global scale.

The Global River Water Quality Archive (GRQA) aims to contribute into improving water quality data coverage by aggregating and harmonizing five national, continental and global datasets: CESI, GEMSTAT, GLORICH, WATERBASE and WQP. The GRQA compilation involved converting observation data from the five sources into a common format and harmonizing the corresponding metadata, flagging outliers, calculating time series characteristics and detecting duplicate observations from sources with a spatial overlap. The final dataset extends the spatial and temporal coverage of previously available water quality data and contains 42 parameters and over 17 million measurements around the globe covering the 1898–2020 time period. Metadata in the form of statistical tables, maps and figures are provided along with observation time series.

The GRQA dataset, supplementary metadata and figures are available for download on the DataCite and OpenAire enabled Zenodo repository <https://doi.org/10.5281/zenodo.5097436> (Virro et al., 2021).

## 1 Introduction

Human-driven loads of nutrients to aquatic ecosystems have become the main driver of eutrophication in waterways and coastal zones (Desmit et al., 2018; Sinha et al., 2019). Agricultural production is already one of the major forces behind environmental degradation (Foley et al., 2011), and population growth is increasing that pressure (Mueller et al., 2012). The use of nitrogen (N) and phosphorus (P) fertilizers to increase agricultural productivity is predicted to increase threefold by 2050 unless more efficient fertilizer use can be implemented (Tilman et al., 2001). At the same time, it has been estimated that "globally, over 3 billion people are at risk of disease because the water quality of their water source is unknown, due to a lack of data" (UN-Water, 2021). In order to achieve the UN SDG 6, we need better understanding of our water resources and water quality. Monitoring and modeling the hydrochemical properties of rivers is essential for understanding and mitigating water quality

deterioration due to agricultural and industrial non-point source pollution (Krysanova et al., 1998; Leon et al., 2001; Wu and  
25 Chen, 2013). Modeling of different water quality indicators such as nutrients (Caraco and Cole, 1999; He et al., 2011), carbon  
compounds (Evans et al., 2005; Hope et al., 1994), sediments (Choubin et al., 2018; Ouyang et al., 2018) and oxygen (Radwan  
et al., 2003; Singh et al., 2009) gives valuable understanding of hydrochemical cycles and enables to estimate the effect of  
human influence on them.

Traditional approaches to water quality modeling consist of applying bottom-up, physically based models on the catchment  
30 level (Wellen et al., 2015). Calibration and validation data in the form of water quality observations used when developing the  
model and verifying its performance is usually gathered through *in situ* observations and, more recently, automated sensor net-  
works. Although airborne remote sensing based data acquisition methods have been successfully used to supplement field data  
for lakes (Chen and Quan, 2011; Toming et al., 2016), applying those methods is only viable in the case of rivers with a large  
enough surface area (Olmanson et al., 2013). Therefore, improving the river water quality data spatial and temporal coverage  
35 with remote sensing is limited. Significant progress has been made in improving the technical capabilities and lowering the  
installation and maintenance costs of the field sensors, but the spatial and temporal coverage of observation sites remains to be  
an issue (Pellerin et al., 2016).

In order to improve the spatial coverage of water quality and hydrological data, different solutions have been used in pre-  
dictive hydrological mapping. Until recently, a common approach for predicting water quality and hydrological phenomena in  
40 ungauged catchments has been the application of already existing process-based models to catchments with similar character-  
istics (Hrachowitz et al., 2013; Strömqvist et al., 2012; Wood et al., 2011). These physical models usually require extensive  
calibration along with location-specific knowledge, which limits the wider applicability and spatial upscaling that can be done  
(Abbaspour et al., 2015; McMillan et al., 2012).

Recently, advances in implementing machine learning (ML) methods in hydrology have given rise to a new, data-driven  
45 approach to hydrological modeling (Mount et al., 2016). Comparison of physically based and ML approaches has shown that  
ML methods can achieve a similar accuracy to the physically based ones and outperform them when describing nonlinear  
relationships (Chau, 2006; Ouali et al., 2017; Papacharalampous et al., 2019). The recent advent of so-called physics-guided  
ML, which entails combining process-based models with ML methods is likely to become more applicable in the near future  
as well (Kratzert et al., 2019; Shen et al., 2018; Marzadri et al., 2021).

50 Nevertheless, a major problem related to large-scale predictive hydrological modeling has been the lack of available obser-  
vation data with a good spatiotemporal coverage (Bierkens, 2015). This has affected the reproducibility of previous studies  
and the potential improvement of existing models (Blöschl et al., 2019; Meals et al., 2010; Stagge et al., 2019). In addition  
to the observation data itself, insufficient or poor quality metadata has also discouraged researchers to integrate the already  
available datasets. Here, ambiguities in supplementary metadata such as parameter names, units and methods of measurement  
55 has limited the use of open data for large-scale water quality modeling purposes (Archfield et al., 2015; Hutton et al., 2016;  
Sprague et al., 2017). Therefore, improving both the availability and quality of open water quality data would increase the  
potential to implement predictive modeling on a global scale. Global ML models have been already successfully used for  
discharge modeling (Beck et al., 2015; Gudmundsson and Seneviratne, 2015) and recent years have seen the publication of

global discharge datasets (Do et al., 2018; Harrigan et al., 2020). The publication of global and continental datasets (Hartmann et al., 2014; Read et al., 2017) could make ML methods applicable for large-scale water quality modeling as well (Shen et al., 2020). However, issues related to a lack of training and validation data due to general data scarcity affects model accuracy and, therefore, limits the further adoption of ML for global water quality predictions (Chen et al., 2020).

We aim to address the aforementioned issues by presenting the novel Global River Water Quality Archive (GRQA) by integrating and harmonizing five different global and regional datasets. The resulting dataset has combined observation data for 42 different forms of some of the most important water quality parameters (Table 7). Supplementary metadata and statistics are provided with the observation time series to improve the usability of the dataset. We report on developing a harmonized schema and reproducible workflow that can be adapted to integrate and harmonize further data sources. In addition, we provide recommendations for improving multi-source water quality data compilation, especially focusing on the metadata quality and adhering to the FAIR Data Principles (Wilkinson et al., 2016). We conclude our study with a call for action to extend this dataset and hope that the provided reproducible method of data integration and metadata provenance shall lead as an example.

## 2 Data

A total of five data sources were used to compile the GRQA with two being global, one regional, and two national level (Table 1). All datasets with the exception of GEMSTAT are publicly available to download online as CSV or Excel file packages. GEMSTAT data can be requested via email. The number of available observation sites was highly dependent on the source with the Water Quality Portal (WQP) maintained by the United States Geological Survey (USGS) having the most sites. Files used during the creation of GRQA are listed in Table 2.

### 2.1 CESI

The first dataset included in GRQA originated from the Canadian Environmental Sustainability Indicators program (CESI) operated by Environment and Climate Change Canada (ECCC), which is a Canadian governmental department responsible for coordinating environmental policies and programs. CESI consists of water quality measurements collected by federal, provincial and territorial monitoring programs from Canadian rivers from the 2002–2018 time period (Environment and Climate Change Canada, 2020). CESI data is mainly focused on heavy metals, so out of the 42 of parameters included in GRQA only eight were available in CESI (Table 1). It is the smallest of the five source datasets with site count ranging from two to 77 per parameter. Mean time series length per site is approximately 13 years and the average number of observations per site is 145.

### 2.2 GEMSTAT

The Global Freshwater Quality Database GEMStat (Färber et al., 2018) is hosted by the International Centre for Water Resources and Global Change (ICWRGC) and provides inland water quality data within the framework of the GEMS/Water Programme of the United Nations Environment Programme (UNEP). GEMStat contains over 7 million samples from approx-



**Table 1.** Source datasets used for compiling GRQA with their total number of observations, parameters and timeframe length in GRQA. All datasets were retrieved on November 16, 2020.

| Dataset   | Name                                | Observations | Timeframe | Parameters | Site count<br>range | Mean time<br>series length<br>per site (years) | Mean<br>observation<br>count per site |
|-----------|-------------------------------------|--------------|-----------|------------|---------------------|------------------------------------------------|---------------------------------------|
| CESI      | Water quality in Canadian rivers    | 30,457       | 2002–2018 | 8/42       | 2–77                | 12.9                                           | 145                                   |
| GEMSTAT   | Global Fresh-water Quality Database | 2,094,598    | 1950–2020 | 32/42      | 7–4,274             | 9.2                                            | 77                                    |
| GLORICH   | GLObal RIver Chemistry database     | 3,231,797    | 1942–2011 | 26/42      | 4–9,728             | 4.1                                            | 41                                    |
| WATERBASE | Waterbase - Water Quality           | 306,332      | 2008–2018 | 15/42      | 4–1,976             | 1.4                                            | 19                                    |
| WQP       | USGS Water Quality Portal           | 8,689,335    | 1898–2020 | 37/42      | 1–59,000            | 3.4                                            | 25                                    |

imately 5,700 sites in 75 countries. The data was obtained through a custom request to their data portal (International Centre for Water Resources and Global Change, 2020).

Approximately 500 water quality parameters were available in the GEMSTAT database, out of which 32 were used when compiling GRQA (Table 1). Observations cover the period 1950–2020 and mean observation count per parameter is approximately 41. Mean time series length per site is nine years. Site count per parameter ranges from less than ten (dissolved and total carbon) to 4,274 (total phosphorus).

### 2.3 GLORICH

The GLObal RIver CHEmistry (GLORICH) database (Hartmann et al., 2014) is a collection of hydrochemical data from more than 1.27 million observations and more than 18,000 sampling locations across the globe. The samples originate from various environmental monitoring programs and scientific literature.

Out of 47 water quality parameters available in the raw data, 26 were chosen to be included in the GRQA (Table 1). The samples cover the time period of 1942–2011, but the length of the time series is dependent on the parameter. Mean time series length per site is less than a decade for all parameters. The number of available sites per parameter ranges from just four (particulate organic nitrogen) to 9,728 (dissolved inorganic phosphorous). The dataset can be downloaded at Pangaea (Hartmann et al., 2019).

**Table 2.** Source dataset files used for compiling GRQA. WQP sites and observations were downloaded separately for each parameter and file names were assigned during the process.

| File name                                                   | Size (MB) | Rows       | Description      | Sheet name         | Source    |
|-------------------------------------------------------------|-----------|------------|------------------|--------------------|-----------|
| wqi-federal-raw-data-2020-<br>iqe-donnees-brutes-fed.csv    | 171.5     | 314,867    | Observation data |                    | CESI      |
| data_request.xls                                            | 2.4       | 5,419      | Site data        | Station_Metadata   | GEMSTAT   |
| data_request.xls                                            | 2.4       | 30         | Parameter data   | Parameter_Metadata | GEMSTAT   |
| data_request.xls                                            | 2.4       | 311        | Method data      | Methods_Metadata   | GEMSTAT   |
| pH.csv                                                      | 21.9      | 372,211    | Observation data |                    | GEMSTAT   |
| Carbon.csv                                                  | 19.2      | 337,928    | Observation data |                    | GEMSTAT   |
| Nitrogen.csv                                                | 65.1      | 1,052,823  | Observation data |                    | GEMSTAT   |
| Phosphorus.csv                                              | 24.3      | 386,113    | Observation data |                    | GEMSTAT   |
| Oxygen_Demand.csv                                           | 20.1      | 331,617    | Observation data |                    | GEMSTAT   |
| Solids.csv                                                  | 11.8      | 201,628    | Observation data |                    | GEMSTAT   |
| Water_Temperature.csv                                       | 23.9      | 370,335    | Observation data |                    | GEMSTAT   |
| Oxygen.csv                                                  | 30.6      | 488,749    | Observation data |                    | GEMSTAT   |
| Sampling_Locations_v1.shp                                   | 0.4       | 15,553     | Site point data  |                    | GLORICH   |
| sampling_locations.csv                                      | 1.6       | 18,897     | Site name data   |                    | GLORICH   |
| catchment_properties.csv                                    | 10.2      | 15,514     | Catchment data   |                    | GLORICH   |
| hydrochemistry.csv                                          | 273.3     | 1,274,102  | Observation data |                    | GLORICH   |
| Waterbase_v2019_1_S_WISE6_<br>SpatialObject_DerivedData.csv | 15.1      | 62,288     | Site data        |                    | WATERBASE |
| ObservedProperty.csv                                        | 0.2       | 888        | Observation data |                    | WATERBASE |
| Waterbase_v2019_1_T_WISE6_<br>DisaggregatedData.csv         | 10019.2   | 39,121,790 | Observation data |                    | WATERBASE |
| WQP_*_sites.csv                                             | 2543      | 9,467,369  | Site data        |                    | WQP       |
| WQP_*_obs.csv                                               | 2749.8    | 10,088,212 | Observation data |                    | WQP       |

## 2.4 WATERBASE

105 Waterbase is the generic name given to the European Environment Agency's (EEA) databases on the status and quality of Europe's rivers, lakes, groundwater bodies and transitional, coastal and marine waters (European Environment Agency, 2020). The database is compiled from data sent by the national European water agencies involved in the Water Framework Directive (WFD).

Over 600 water quality parameters are included in the full dataset out of which 15 matched those of GRQA (Table 1). Out  
110 of all source datasets, WATERBASE had the shortest time series with observations covering only the period 2008–2018. The maximum site count per parameter is 1,976, while there were on average only around 19 observations per site.

In May 2020, the ICWRGC announced that parts of WATERBASE had been also added to the GEMSTAT database (International Centre for Water Resources and Global Change, 2020). However, only sites with more than three years of data were included in this update. As mean time series length per site was only 1.4 years in WATERBASE, a significant number of sites  
115 were left out, which is why we decided to include WATERBASE separately in GRQA. Although it is likely that there were many observations, which appeared both in GEMSTAT and WATERBASE, the duplication detection procedure discussed in section 3.3 should have identified them.

## 2.5 WQP

USGS, the U.S. Environmental Protection Agency (EPA) and the National Water Quality Monitoring Council developed the  
120 Water Quality Portal (WQP), which is so far the largest standardised water quality database (Read et al., 2017; United States Geological Survey, 2020). Although the portal also includes data from a few other countries (e.g. Mexico, Pacific islands) associated with the National Water Information System (NWIS) network, only a very limited amount of non-US samples were available. For this reason, only US national data was selected to be added to GRQA.

Due to the size of the source dataset, the full set of parameters could not be downloaded at once. Therefore, a scripted  
125 download procedure was used to retrieve water quality samples and their corresponding sampling sites separately per parameter. In the case of temperature, the data had to be further divided by state. Unlike other source datasets used in the study, the WQP often had multiple versions of the same parameter available under separate codes, in case the parameter had been measured in different units, using different methods, etc. The final count of parameters used for GRQA was 37 (Table 1).

The longest time series of source datasets is present in the WQP with some dating back to 1898. However, the average time  
130 series length per station is just over three years. Like GEMSTAT, WQP is still being updated, so most parameters have their latest observations from 2020. Site count ranges from a single station (dissolved inorganic nitrogen) to 59,000 per parameter (total suspended solids).

### 3 Methodology

The GRQA compilation workflow was divided into three parts: (1) The pre-processing stage involved converting observation data from the five sources into a common format and harmonizing the corresponding metadata; (2) Pre-processed data were merged by parameter, after which outliers and time series characteristics were detected; (3) Duplicate detection was conducted in the last processing step. The Pandas (McKinney et al., 2010), GeoPandas (Jordahl et al., 2020) and NumPy (Harris et al., 2020) Python libraries were used throughout all data processing stages.

#### 3.1 Source data preprocessing

*Parameter selection.* The parameters included in GRQA cover the four groups of water quality indicators outlined in the introduction: nutrients, carbon, sediments and oxygen (Table 7). GLORICH was used as a reference for parameter selection due to being one of the two global source datasets and having the least amount of discrepancies within source data, i.e. each GLORICH parameter had a single matching code, unit, etc.

*Parameter harmonization.* Preliminary analysis showed that there were ambiguities in the parameter names, codes, units and chemical forms in the different source datasets, which has been identified as a recurring issue when dealing with multi-source water quality data (McMillan et al., 2012; Sprague et al., 2017). For this reason, lookup tables were created for each of the source datasets (*\*\_code\_map.csv*) to use as guides in the following processing stages (Table 3). The purpose of the schemas was to match parameter codes and other metadata with the versions used later in the GRQA. For most parameters, this could be done based on the literal names, remarks and descriptions in the metadata. Relevant literature and online resources were consulted for more ambiguous scenarios. One such example was total suspended solids (TSS), which can also be reported as suspended particulate matter (SPM) (Neukermans et al., 2012). Where a reliable decision could not be made (e.g. biological oxygen demand as BOD vs BOD5) the parameters were kept separate.

*Unit conversion.* Units of measurement were harmonized along with other metadata. All parameters except temperature (°C), pH and dissolved oxygen (%) were converted into mg/l, which was the most prevalent unit in source data. Where units were converted, observation values had to be changed as well. This was done by calculating conversion constants, which were based on both the magnitude of the source unit (e.g.  $\mu\text{g/l}$  vs  $\text{mg/l}$ ) and the reported chemical form of the parameter. The latter affected nitrite ( $\text{NO}_2$ ), nitrate ( $\text{NO}_3$ ) and ammonium ( $\text{NH}_4$ ) the most, as these parameters had a variety of forms in the source data that were all converted into corresponding nitrogen versions ( $\text{NO}_2\text{-N}$ ,  $\text{NO}_3\text{-N}$  &  $\text{NH}_4\text{-N}$ ). In some cases, the chemical form could be identified from the source unit (e.g.  $\text{mg}\{\text{N}\}/\text{L}$  or  $\text{mg}\{\text{NO}_3\}/\text{L}$ ), while others were detected by examining parameter names and method descriptions (e.g. "Nitrate, reported as nitrogen"). Where possible, additional information about these missing forms was collected from proxy sources, such as other similar datasets (e.g. Börker et al. (2020) in the case of GLORICH). These references have been included in the *form\_ref* column in corresponding lookup tables (*\*\_code\_map.csv*). For other nitrogen (TKN, TN, etc.), all carbon (DOC, TC, etc.) and phosphorus (TP, TIP, etc.) parameters, the chemical were assumed to be either N, C or P even if not reported, because there is only one common element in the molecule (Sprague et al., 2017). GLORICH was the only source dataset, which also needed conversion constants for carbon and phosphorus parameters as they had been

**Table 3.** Summary table of lookup table attributes.

| Attribute name         | Description                                                                                              | Data type |
|------------------------|----------------------------------------------------------------------------------------------------------|-----------|
| source_param_code      | Parameter code in source dataset                                                                         | string    |
| source_param_code_meta | Additional code specification used for CESI                                                              | string    |
| param_code             | Parameter code in GRQA                                                                                   | string    |
| source_param_name      | Parameter name in source dataset                                                                         | string    |
| param_name             | Parameter name in GRQA                                                                                   | string    |
| source_param_form      | Parameter chemical form in source dataset                                                                | string    |
| param_form             | Parameter chemical form in GRQA                                                                          | string    |
| form_ref               | Parameter form reference                                                                                 | string    |
| source_unit            | Parameter unit in source dataset                                                                         | string    |
| divisor                | Divisor applied to the observation value                                                                 | float     |
| multiplier             | Multiplier applied to the observation value                                                              | float     |
| conversion_constant    | Unit conversion constant calculated based on divisor and multiplier and applied to the observation value | float     |
| unit                   | Parameter unit in GRQA                                                                                   | string    |
| source                 | Source dataset name                                                                                      | string    |

**Table 4.** Examples of unit conversion from the chemical form in source data to the GRQA version.  $x_1$  and  $x_2$  are observation values before and after conversion, respectively.

| Parameter code | Source    | Form | Source form | Unit | Source unit | $x_1$   | $M_{x_2}$ | $n$  | $M_{x_1}$ | $x_2$ |
|----------------|-----------|------|-------------|------|-------------|---------|-----------|------|-----------|-------|
| TAN            | CESI      | N    | NH3         | mg/l | mg/l        | 0.106   | 14.007    | 1    | 17.031    | 0.087 |
| NO2N           | GEMSTAT   | N    | NO2         | mg/l | mg/l NO2    | 0.024   | 14.007    | 1    | 46.005    | 0.007 |
| NO3N           | GLORICH   | N    | NO3         | mg/l | $\mu$ mol/l | 210.268 | 14.007    | 1000 | 62.004    | 0.048 |
| NH4N           | WATERBASE | N    | NH4         | mg/l | mg/l        | 0.063   | 14.007    | 1    | 18.039    | 0.049 |

reported as  $\mu$ mol/l. All WQP units matched those intended to be used for GRQA, so no conversion was needed. The formula for conversion constants was

$$x_2 = \frac{x_1 \times M_{x_2}}{n \times M_{x_1}} \tag{1}$$

where  $x_1$  and  $x_2$  are observation values before and after conversion,  $M$  is the corresponding molar mass and  $n$  the magnitude difference between source and converted unit. Some examples of unit conversion are given in Table 4. The full list of all unit conversion procedures is given in the appendix (Table A1).

*Site ID duplication.* There were some instances of duplicated site IDs in GLORICH (2 site pairs) and WATERBASE (101 pairs) source data, which meant that joining observations with sites would have created duplicate time series as well. Site ID duplicates could indicate that there have been small shifts in the site location or that the site had been closed and reinstated

175 at some point. If the distance between the duplicate pairs was less than a kilometer, only the first instance was retained in the output table. When distance was greater than a kilometer both instances were removed as metadata that could be used to make a decision (e.g. when the site first opened) was not available. Finally, all duplicate pairs were exported as separate files (e.g. *GLORICH\_dup\_sites*).

*Coordinate conversion.* CESI and WQP originally had the site coordinates in the North American Datum of 1983 (NAD83).  
180 The Pyproj (Snow et al., 2020) Python library was used for converting the North American site coordinates into World Geodetic System 1984 (WGS84) which was the coordinate system chosen for the GRQA.

*Observation data filtering.* Preliminary cleaning included the removal of observations of negative, missing or low quality values. In this case, low quality refers to measurements that were flagged as either coming from unreliable sources or having any kind of literal quality assessment flag in the source data (e.g. "poor quality"). Additionally, observations marked as below (<)  
185 or above (>) detection limit in source data where flagged as such in GRQA as well (column *detection\_limit\_flag*). Observations originating from unreliable sources or otherwise suspect (e.g. unvalidated) were omitted. Three source datasets (GEMSTAT, GLORICH & WATERBASE) had this type of a quality evaluation included in the metadata. Observations from sites marked as "Not for publication" due to national legislation in WATERBASE were also not included in GRQA.

*Filtration information.* Where possible, supplementary information about whether a sample was filtered or unfiltered was  
190 retained as filtration can affect the sample values (Sprague et al., 2017). This information was usually available in a separate metadata column. Both "filtered" and "dissolved" were used depending on the source. GRQA includes the dissolved versions of certain parameters (total nitrogen, total phosphorus and Kjeldahl nitrogen), which originally did not exist as separate parameters in WATERBASE and WQP. In those cases, the filtered/dissolved observations of TN, TP and TKN in the two datasets were treated as the corresponding dissolved forms (TDN, TDP, DKN) in GRQA.

*Time and date processing.* Observations could have invalid timestamps due to formatting or entry errors, so a validity check  
195 was included in the pre-processing scripts. Dates were tested against the presumed source format and observations with incorrectly formatted or implausible dates were removed. The source datasets used different date formats, which were all converted into a common one (%Y-%m-%d). Where possible, observation time was extracted as well. A default value (00:00:00) was used to fill missing information. Time zone information was only possible to extract from the WQP. Other sources lacked time zone  
200 information, so it was not possible to determine whether the recorded timestamp was in local or Coordinated Universal Time (UTC) and the time given is up to the user to interpret.

*Other metadata.* If available, metadata about the upstream basin area, its unit and the name of the greater drainage region  
of the site was included in GRQA. Additional information about methods used or other available observation remarks in the source data were also retained. The metadata depended on the source and was available only sporadically and could not be  
205 concatenated in a reasonable way between the datasets, so the information is given in the GRQA for each source separately in the format of *source\_meta\_sourcecolumnname* (e.g. *GEMSTAT\_meta\_Analysis Method Code*). Here, the source column names were kept as they appear in raw data, e.g. spaces were not replaced with underscores.

### 3.2 Outlier treatment, time series availability and continuity

*Time series availability and continuity.* The analysis of the statistics generated during pre-processing showed that most of the time series extracted from the source datasets are very discontinuous. For example, the mean time series length per site for total phosphorus (TP) in GEMSTAT was 6.6 years and 4.9 years in GLORICH, while the mean observation count per site was only 57.7 and 52.4, respectively. This means that many sites have observations at a monthly time step at best. Similar findings have been previously reported about WQP time series (Read et al., 2017; Shen et al., 2020).

In order to illustrate the suspected temporal fragmentation in observation data, monthly availability and monthly continuity statistics appropriated from the strategy used by Crochemore et al. (2019) were calculated for each site in each of the merged parameter time series. Both characteristics can give insight to the granularity of the time series and can affect the applicability of different modeling methods. Monthly availability of observation data was defined as the ratio between number of months with at least one observation and the total number of months a particular site had any observations. A ratio of 1.0 would mean that there was at least one observation in every month of the time series. Monthly continuity was calculated as the ratio between the longest period of consecutive months with any measurements and the length of time series in months. Here, a ratio of 1.0 would mean that there were no months without observations and the time series is continuous on a monthly level. The resulting characteristics were added as columns in the output files.

*Outlier flagging.* Water quality modeling often involves dealing with numerous outliers and uncertainties in observation data, particularly when integrating time series from multiple sources (McMillan et al., 2012; Sprague et al., 2017). Due to the differences in environmental conditions and water regimes, the potential range of observation values can vary a lot between catchments. Although extreme outliers caused by faulty equipment or data entry errors can sometimes be detectable by examining distribution plots, it is often difficult to decide whether an outlier is an error or not. For example, sudden spikes in observation time series can be caused by events such as accidental fertilizer spills to the waterway or a cow getting entrapped in a in-stream wetland (Hughes et al., 2016), which can have short-term effects on water quality and, therefore, should not be removed from data. However, flagging outliers can still help researchers troubleshoot potential issues at the modeling stage.

For this reason, no observations were omitted from the time series and two flags associated with outliers were added to the output tables instead. First flag (*obs\_iqr\_outlier*) shows whether an observation was deemed to be an outlier by the interquartile range (*IQR*) test. *IQR* is defined as the difference between the third (*Q3*) and first (*Q1*) quartile. All values greater than  $Q3 + 1.5 \times IQR$  or less than  $Q1 - 1.5 \times IQR$  are considered outliers. The second flag (*obs\_percentile*) was an indicator (0.0–1.0) showing which percentile a particular observation belongs to. Histograms along with box and whisker plots were used to visually show the range and distribution of the parameter observations. The plots were produced for every parameter and are included in the GRQA data repository.

### 3.3 Duplicate observation detection

The global datasets (GEMSTAT and GLORICH) used in this study had at least partial spatial overlap with the other three sources, which means that merging could have created duplicate sites in the GRQA. Contrary to site ID duplicates within the

same dataset discussed in section 3.1, site duplicates from different sources would likely also have different IDs. Therefore, rather than comparing ID information, the duplicates had to be identified by spatial proximity and time series similarity. Similar to procedures described in section 3.2, duplicate detection was done separately for each parameter.

First stage of duplicate detection was clustering sites based on their geographic location. The DBSCAN (density-based spatial clustering of applications with noise) algorithm (Xu et al., 1998) from the Scikit-learn Python library (Pedregosa et al., 2011) was used to create clusters of sites within a one kilometer radius of each other, which is the approximate accuracy of around two decimal points in latitude/longitude degrees. There does not seem to be a consensus for assigning this search radius for duplicate detection and the assessment of spatial proximity depends on the subjective threshold set by authors. For example, the GSIM streamflow dataset (Do et al., 2018) used a radius of 5 km for selecting potential duplicate gauging stations. The 1 km radius was chosen to avoid having too many false positives (e.g. in the case of small headwater catchments) to evaluate in the second stage of deduplication (RMSE calculation). A major advantage of DBSCAN compared to similar density-based clustering methods is that the algorithm can be run without determining a priori the number of output clusters (Birant and Kut, 2007). In addition, DBSCAN has shown to be more applicable than others when dealing with large-scale datasets (Khan et al., 2014; Parimala et al., 2011).

Although there are time series similarity detection methods that can be applied to irregular time series and handle some degree of discontinuity, the focus of those methods is on misalignment of the time of observations rather than differences in the pattern of time series gaps (Berndt and Clifford, 1994). Therefore, it is likely that GRQA time series are too fragmented for these advanced methods to yield reliable results. A conservative approach based on root-mean-square error (RMSE) was chosen here instead. Output site clusters were converted into unique site pairs, so that all sites within a cluster could be compared to one another (e.g. a cluster of four would yield six unique ID pairs). Site ID pairs were then used to extract corresponding time series from observation data. Only observations made on matching dates were used for calculating the RMSE and only pairs where RMSE was equal to zero were considered as potential duplicates. Finally, the duplicates were exported into separate CSV files (e.g. *TP\_dup\_obs.csv*) along with relevant metadata to help the user decide whether the sites can be considered duplicate (Table 5). A high number of matching dates with the same observation value (column *date\_match\_count*) would indicate a higher likelihood of duplication.

## 4 Results

*GRQA data model and descriptive overview.* The GRQA dataset consists of observation time series for 42 different water quality parameters provided in tabular form as CSV files. Each of the observation files is accompanied by corresponding metadata files (tables and images) describing the spatial and temporal characteristics of the time series.

GRQA is made up of the following files:

- Water quality observation time series files (named *paramcode\_GRQA.csv*)
- Harmonization schemas used in the preprocessing stage (*source\_code\_map.csv*) for each source dataset



**Table 5.** Summary table of duplicate observation file attributes.

| Attribute name         | Description                                              | Data type |
|------------------------|----------------------------------------------------------|-----------|
| obs_id_1               | Observation ID of first site                             | string    |
| lat_wgs84_1            | Latitude of first site                                   | float     |
| lon_wgs84_1            | Longitude of first site                                  | float     |
| site_id_1              | First site ID                                            | string    |
| site_name_1            | First site name                                          | string    |
| obs_value_1            | First site observation value                             | float     |
| source_1               | First site source                                        | string    |
| site_ts_availability_1 | First site availability                                  | float     |
| site_ts_continuity_1   | First site continuity                                    | float     |
| obs_date               | Observation date                                         | string    |
| obs_id_2               | Observation ID of second site                            | string    |
| lat_wgs84_2            | Latitude of second site                                  | float     |
| lon_wgs84_2            | Longitude of second site                                 | float     |
| site_id_2              | Second site ID                                           | string    |
| site_name_2            | Second site name                                         | string    |
| obs_value_2            | Second site observation value                            | float     |
| source_2               | Second site source                                       | string    |
| site_ts_availability_2 | Second site availability                                 | float     |
| site_ts_continuity_2   | Second site continuity                                   | float     |
| date_match_count       | Number of matching dates with the same observation value | int       |
| param_code             | Parameter code                                           | string    |

- Summary statistics of observation values by parameter for each source dataset before (*paramcode\_source\_raw\_stats.csv*) and after (*paramcode\_source\_processed\_stats.csv*) processing
- 275 – Histograms (*paramcode\_GRQA\_hist.png*) and box plots (*paramcode\_GRQA\_box.png*) showing the distribution of observation values by source dataset
- Maps showing the spatial distribution of the observations by source (*paramcode\_GRQA\_spatial\_dist.png*)
- Maps showing the median observation values of sites (*paramcode\_GRQA\_median.png*)
- Maps showing the monthly availability (*paramcode\_GRQA\_availability.png*) and continuity (*paramcode\_GRQA\_continuity.png*) of the observations
- 280 – Where relevant, duplicate site ID files (*source\_dup\_sites.csv*)
- Where relevant, duplicate observation files (*source\_dup\_obs.csv*)

**Table 6.** Summary table of output water quality observation file attributes.

| Attribute name           | Description                                                                                                            | Data type |
|--------------------------|------------------------------------------------------------------------------------------------------------------------|-----------|
| obs_id                   | Unique observation ID generated by hashing                                                                             | string    |
| lat_wgs84                | Observation site latitude in WGS84                                                                                     | float     |
| lon_wgs84                | Observation site longitude in WGS84                                                                                    | float     |
| obs_date                 | Observation date in the %Y-%m-%d format                                                                                | string    |
| obs_time                 | Observation time in the %H:%M:%S format                                                                                | string    |
| obs_time_zone            | Observation time zone code                                                                                             | string    |
| site_id                  | Observation site ID                                                                                                    | string    |
| site_name                | Observation site name                                                                                                  | string    |
| site_country             | Observation site country                                                                                               | string    |
| upstream_basin_area      | Site upstream basin area                                                                                               | string    |
| upstream_basin_area_unit | Site upstream basin area unit                                                                                          | string    |
| drainage_region_name     | Drainage region where site is located in                                                                               | string    |
| param_code               | Parameter code in GRQA                                                                                                 | string    |
| source_param_code        | Parameter code in source dataset                                                                                       | string    |
| param_name               | Parameter name in GRQA                                                                                                 | string    |
| source_param_name        | Parameter name in source dataset                                                                                       | string    |
| obs_value                | Observation value in GRQA                                                                                              | float     |
| source_obs_value         | Observation value in source dataset                                                                                    | float     |
| detection_limit_flag     | Whether a value was flagged as below (<) or above (>) detection limit in source data                                   | string    |
| param_form               | Parameter chemical form in GRQA                                                                                        | string    |
| source_param_form        | Parameter chemical form in source dataset                                                                              | string    |
| unit                     | Parameter unit in GRQA                                                                                                 | string    |
| source_unit              | Parameter unit in source dataset                                                                                       | string    |
| filtration               | Sample filtration information                                                                                          | string    |
| source                   | Source dataset name                                                                                                    | string    |
| obs_percentile           | Percentile of the observation value                                                                                    | float     |
| obs_iqr_outlier          | Flag to mark whether observation value is an outlier according to the interquartile range test                         | string    |
| site_ts_availability     | Monthly availability of the time series per site                                                                       | float     |
| site_ts_continuity       | Monthly continuity of the time series per site                                                                         | float     |
| *_meta_*                 | Other observation metadata with a reference to the corresponding source column (e.g., GEMSTAT_meta_Method Description) | string    |
| ...                      | ...                                                                                                                    |           |



**Table 7. GRQA water quality parameter statistics.**

|     | Parameter code | Parameter name                   | Sites  | Observations | Median value | Unit | Start year | End year | Outlier % |
|-----|----------------|----------------------------------|--------|--------------|--------------|------|------------|----------|-----------|
| 285 | BOD            | Biochemical Oxygen Demand        | 2,945  | 163,531      | 2.627        | mg/l | 1974       | 2019     | 13.4      |
|     | BOD5           | Biochemical Oxygen Demand (BOD5) | 13,283 | 278,629      | 5.875        | mg/l | 1905       | 2020     | 8.3       |
|     | BOD7           | Biochemical Oxygen Demand (BOD7) | 386    | 5,282        | 2.200        | mg/l | 2013       | 2018     | 5.9       |
|     | COD            | Chemical Oxygen Demand           | 2,769  | 126,372      | 22.362       | mg/l | 1974       | 2019     | 10.8      |
|     | CODCr          | Chemical Oxygen Demand (Cr)      | 671    | 7,350        | 24.900       | mg/l | 2013       | 2018     | 3.4       |
|     | CODMn          | Chemical Oxygen Demand (Mn)      | 287    | 2,310        | 4.600        | mg/l | 2013       | 2018     | 2.3       |
|     | DC             | Total Dissolved Carbon           | 7      | 9            | 4.800        | mg/l | 2000       | 2001     | 0         |
|     | DIC            | Dissolved Inorganic Carbon       | 969    | 30,633       | 12.266       | mg/l | 1968       | 2020     | 3.5       |
|     | DIN            | Dissolved Inorganic Nitrogen     | 119    | 7,822        | 4.200        | mg/l | 1998       | 2019     | 2.6       |
|     | DIP            | Dissolved Inorganic Phosphorus   | 9,931  | 612,922      | 0.040        | mg/l | 1942       | 2017     | 13.3      |
|     | DKN            | Dissolved Kjeldahl Nitrogen      | 2,820  | 80,732       | 0.347        | mg/l | 1973       | 2020     | 6.5       |
|     | DO             | Dissolved Oxygen                 | 48,072 | 1,487,724    | 8.835        | mg/l | 1898       | 2020     | 2.2       |
|     | DOC            | Dissolved Organic Carbon         | 14,799 | 413,328      | 2.804        | mg/l | 1968       | 2020     | 6.8       |
|     | DON            | Dissolved Organic Nitrogen       | 10,811 | 163,630      | 0.371        | mg/l | 1951       | 2020     | 8.1       |
|     | DOP            | Dissolved Organic Phosphorus     | 142    | 899          | 0.010        | mg/l | 1971       | 2003     | 8.7       |
|     | DOSAT          | Dissolved Oxygen Saturation      | 34,949 | 953,274      | 92.164       | %    | 1898       | 2020     | 8.7       |
|     | NH4N           | Ammonium Nitrogen                | 11,372 | 651,850      | 0.027        | mg/l | 1942       | 2018     | 15.1      |
|     | NO2N           | Nitrite Nitrogen                 | 30,902 | 720,944      | 0.010        | mg/l | 1900       | 2020     | 12.7      |
|     | NO3N           | Nitrate Nitrogen                 | 45,422 | 1,229,584    | 0.468        | mg/l | 1900       | 2020     | 11.1      |
|     | PC             | Particulate Carbon               | 2,898  | 51,049       | 0.908        | mg/l | 1995       | 2020     | 11        |
|     | pH             | pH                               | 27,577 | 1,372,794    | 6.886        | pH   | 1900       | 2020     | 14.1      |
|     | PIC            | Particulate Inorganic Carbon     | 1,095  | 9,196        | 0.060        | mg/l | 1974       | 2020     | 14        |
|     | PN             | Particulate Nitrogen             | 2,996  | 56,125       | 0.129        | mg/l | 1981       | 2020     | 9.5       |
|     | POC            | Particulate Organic Carbon       | 22,910 | 615,941      | 1.617        | mg/l | 1900       | 2020     | 9.7       |
|     | PON            | Particulate Organic Nitrogen     | 28     | 1,111        | 0.120        | mg/l | 1989       | 2019     | 14        |
|     | POP            | Particulate Organic Phosphorus   | 12     | 13           | 0.020        | mg/l | 1999       | 2000     | 7.7       |
|     | TAN            | Total Ammonia Nitrogen           | 27,980 | 717,776      | 0.065        | mg/l | 1900       | 2020     | 13.3      |
|     | TC             | Total Carbon                     | 1,181  | 12,338       | 27.000       | mg/l | 1968       | 2007     | 3.3       |

**Table 7. Continued.**

| Parameter code | Parameter name               | Sites  | Observations | Median value | Unit  | Start year | End year | Outlier % |
|----------------|------------------------------|--------|--------------|--------------|-------|------------|----------|-----------|
| TDN            | Total Dissolved Nitrogen     | 968    | 62,980       | 0.310        | mg/l  | 1972       | 2020     | 11.2      |
| TDP            | Total Dissolved Phosphorus   | 3,325  | 169,297      | 0.031        | mg/l  | 1965       | 2020     | 11.3      |
| TEMP           | Water Temperature            | 26,860 | 1,113,471    | 18.968       | Deg C | 1912       | 2020     | 9.3       |
| TIC            | Total Inorganic Carbon       | 1,984  | 23,024       | 11.833       | mg/l  | 1968       | 2019     | 3.8       |
| TIN            | Total Inorganic Nitrogen     | 78     | 12,951       | 3.649        | mg/l  | 1992       | 2020     | 0.8       |
| TIP            | Total Inorganic Phosphorus   | 1,328  | 42,495       | 0.026        | mg/l  | 1971       | 2018     | 13.8      |
| TKN            | Total Kjeldahl Nitrogen      | 9,418  | 425,595      | 0.680        | mg/l  | 1962       | 2020     | 8.1       |
| TN             | Total Nitrogen               | 18,507 | 575,887      | 1.329        | mg/l  | 1958       | 2020     | 11.9      |
| TOC            | Total Organic Carbon         | 18,032 | 420,029      | 4.526        | mg/l  | 1958       | 2020     | 7.2       |
| TON            | Total Organic Nitrogen       | 22,799 | 592,654      | 0.622        | mg/l  | 1900       | 2020     | 8.6       |
| TOP            | Total Organic Phosphorus     | 294    | 1,811        | 0.030        | mg/l  | 1971       | 2020     | 11.9      |
| TP             | Total Phosphorus             | 44,990 | 1,914,538    | 0.105        | mg/l  | 1900       | 2020     | 11.8      |
| TPP            | Total Particulate Phosphorus | 77     | 5,836        | 0.021        | mg/l  | 1978       | 2019     | 10.5      |
| TSS            | Total Suspended Solids       | 68,592 | 1,958,429    | 9.785        | mg/l  | 1898       | 2020     | 20.5      |

The structure of GRQA observation files is given in Table 6. In addition to the attributes outlined in section 3, the extracted metadata also includes information about the upstream basin and drainage region of the observation site. It has to be noted that the availability of this information was dependent on both the source (i.e. not present in CESI and WATERBASE) and the observation site itself and is therefore available only sporadically in GRQA as well (Table 6). Parameter codes, names, forms and observation values in GRQA are given as they appeared in source data alongside their harmonized and processed GRQA versions, so that end users could assess the validity of conversion and make corrections if needed.

Statistical overview of the parameters included in GRQA is shown in Table 7. The number of sites per parameter ranges from only 7 (DC) up to 68,592 (TSS). Parameters having more sites generally also have more observations. Parameters with a small number of sites and observations were usually present in only one or two source datasets. For example, dissolved organic phosphorus (DOP) only existed in WQP. Different versions of biochemical and chemical oxygen demand that could not be harmonized based on source metadata were kept separate, although the median value for BOD and BOD5 ended up being equal.

Spatial distribution of water quality observation sites depended on the parameter and is illustrated in Fig. 1 using dissolved oxygen (DO), dissolved organic carbon (DOC), TP and TSS. These parameters were the largest in terms of number of sites and observations in their corresponding groups (oxygen, carbon, nutrients and sediments). They are also used in the following figures. Some observations that could be made when examining site maps were the following:

- Europe and North America are the best represented in the case of all parameters

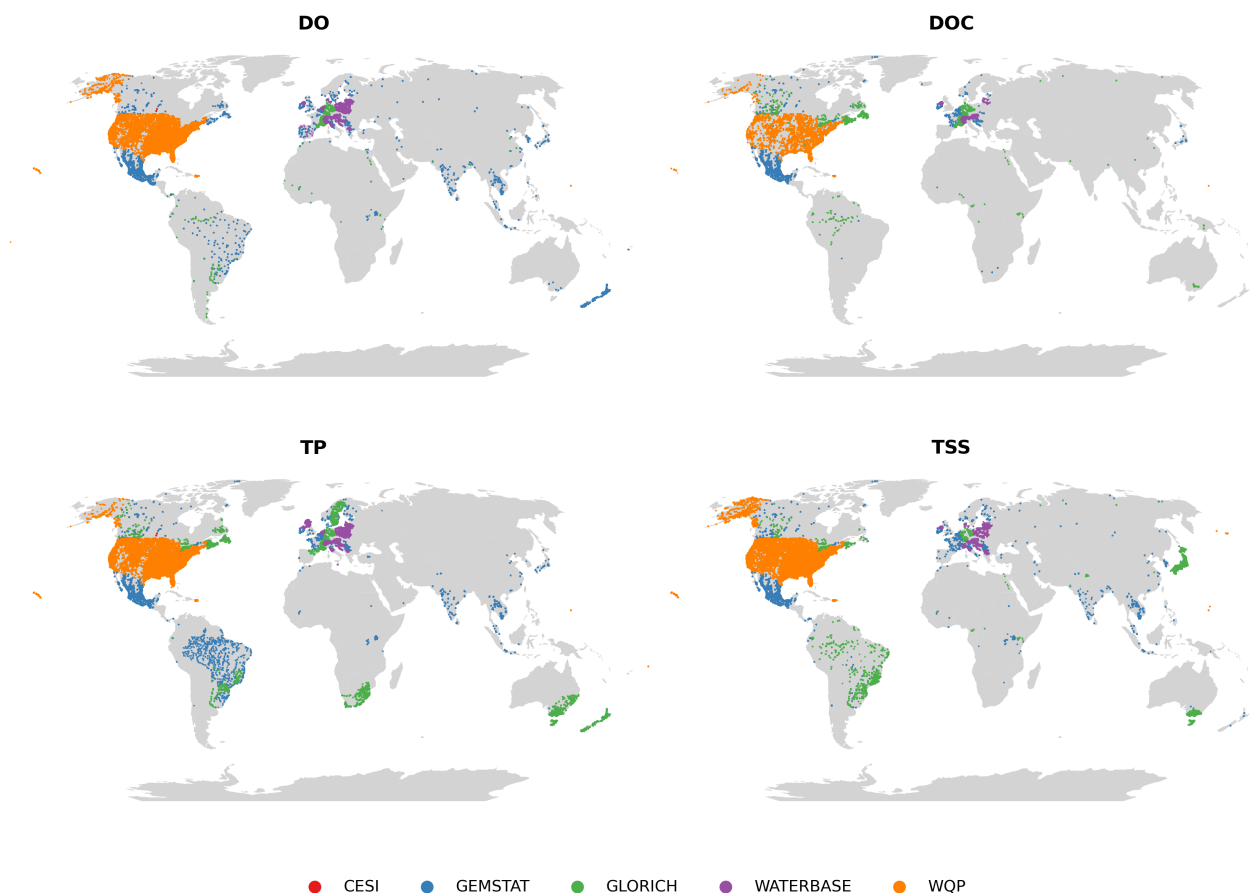

**Figure 1.** Distribution of observation sites for dissolved oxygen (DO), dissolved organic carbon (DOC), total phosphorus (TP) and total suspended solids (TSS).

- Coverage is also good in Australia, New Zealand, parts of East Asia and Brazil in the case of some of the key parameters (e.g. TP, TN)
- Rest of the world (Africa, most of Asia) only has sporadic coverage

The temporal distribution of the four parameters is given in Fig. 2. Similar to the spatial distribution, temporal coverage of observations depended on both source data and parameter with WQP having the longest and WATERBASE the shortest time series. Most of the data from GEMSTAT are from the past decade, while GLORICH has a more even observation distribution throughout the time series.

*Statistical characteristics of GRQA observation time series.* As mentioned in the previous section, each of the observation files was accompanied by a set of images and tables giving insight into the characteristics of the observation time series. The structure of tabular summary statistics is shown in Table 8. These files contain some basic statistics (standard deviation, etc) about observation values per parameter and source. In addition, information about the temporal characteristics of time series

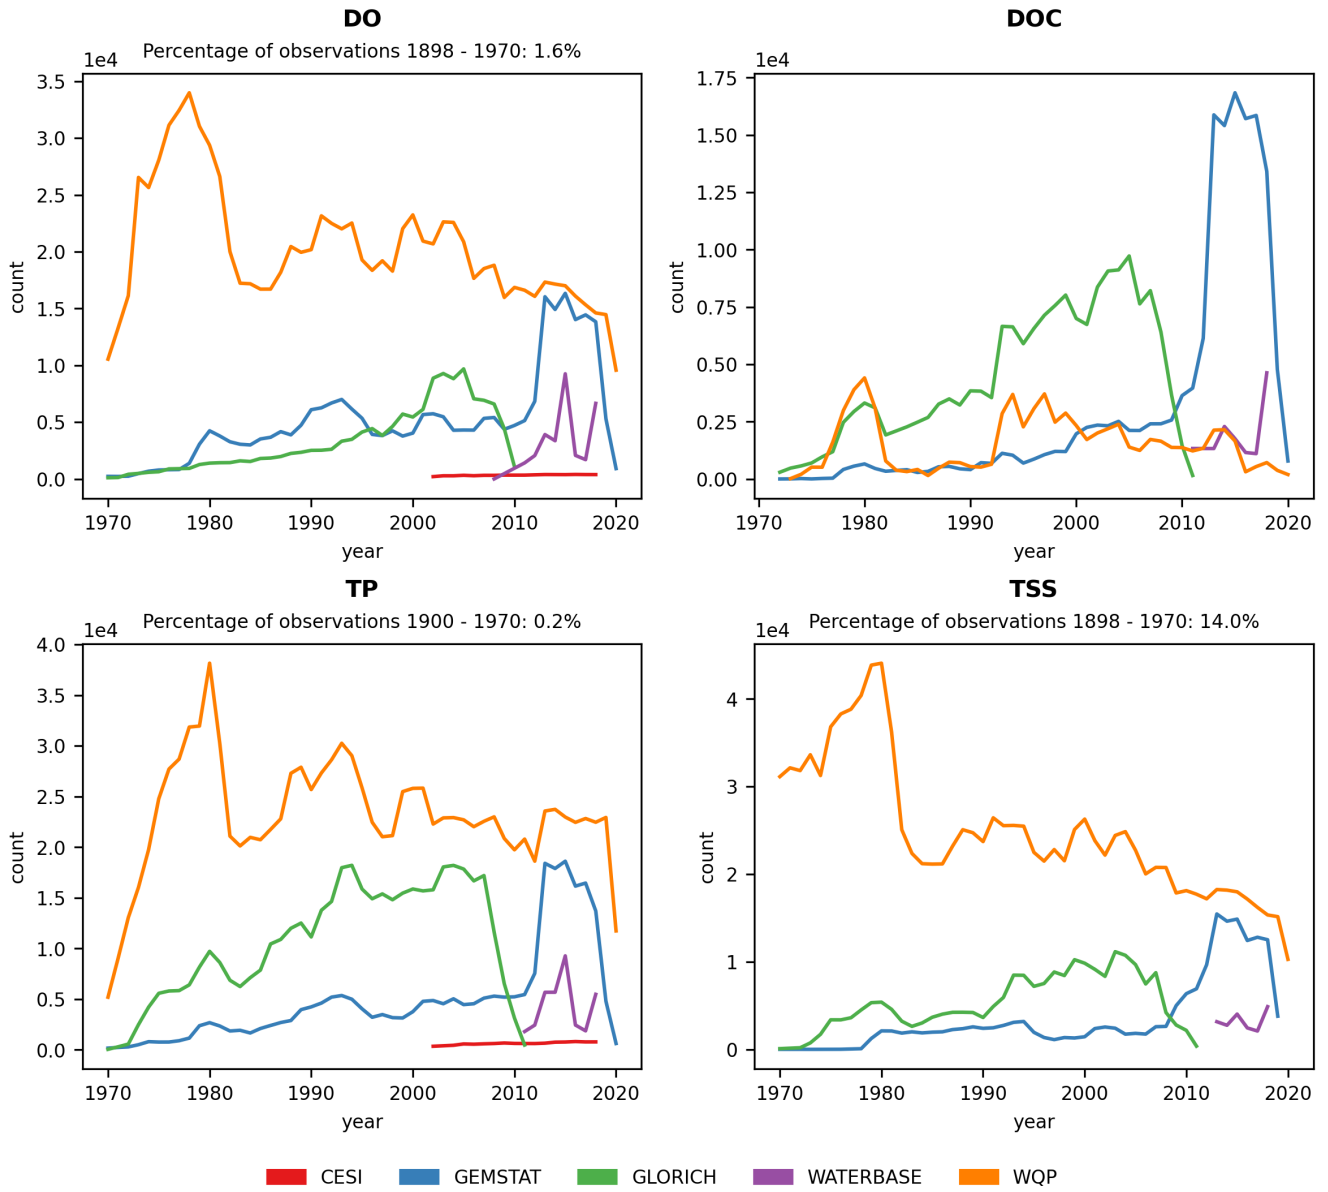

**Figure 2.** Temporal distribution of observations for dissolved oxygen (DO), dissolved organic carbon (DOC), total phosphorus (TP) and total suspended solids (TSS) for the period 1970–2020. Percentage of observations before the period shown on the plot is given for each parameter. Only seven observations ( $1.69 \times 10^{-5}\%$ ) existed for DOC in the 1968–1970 period.

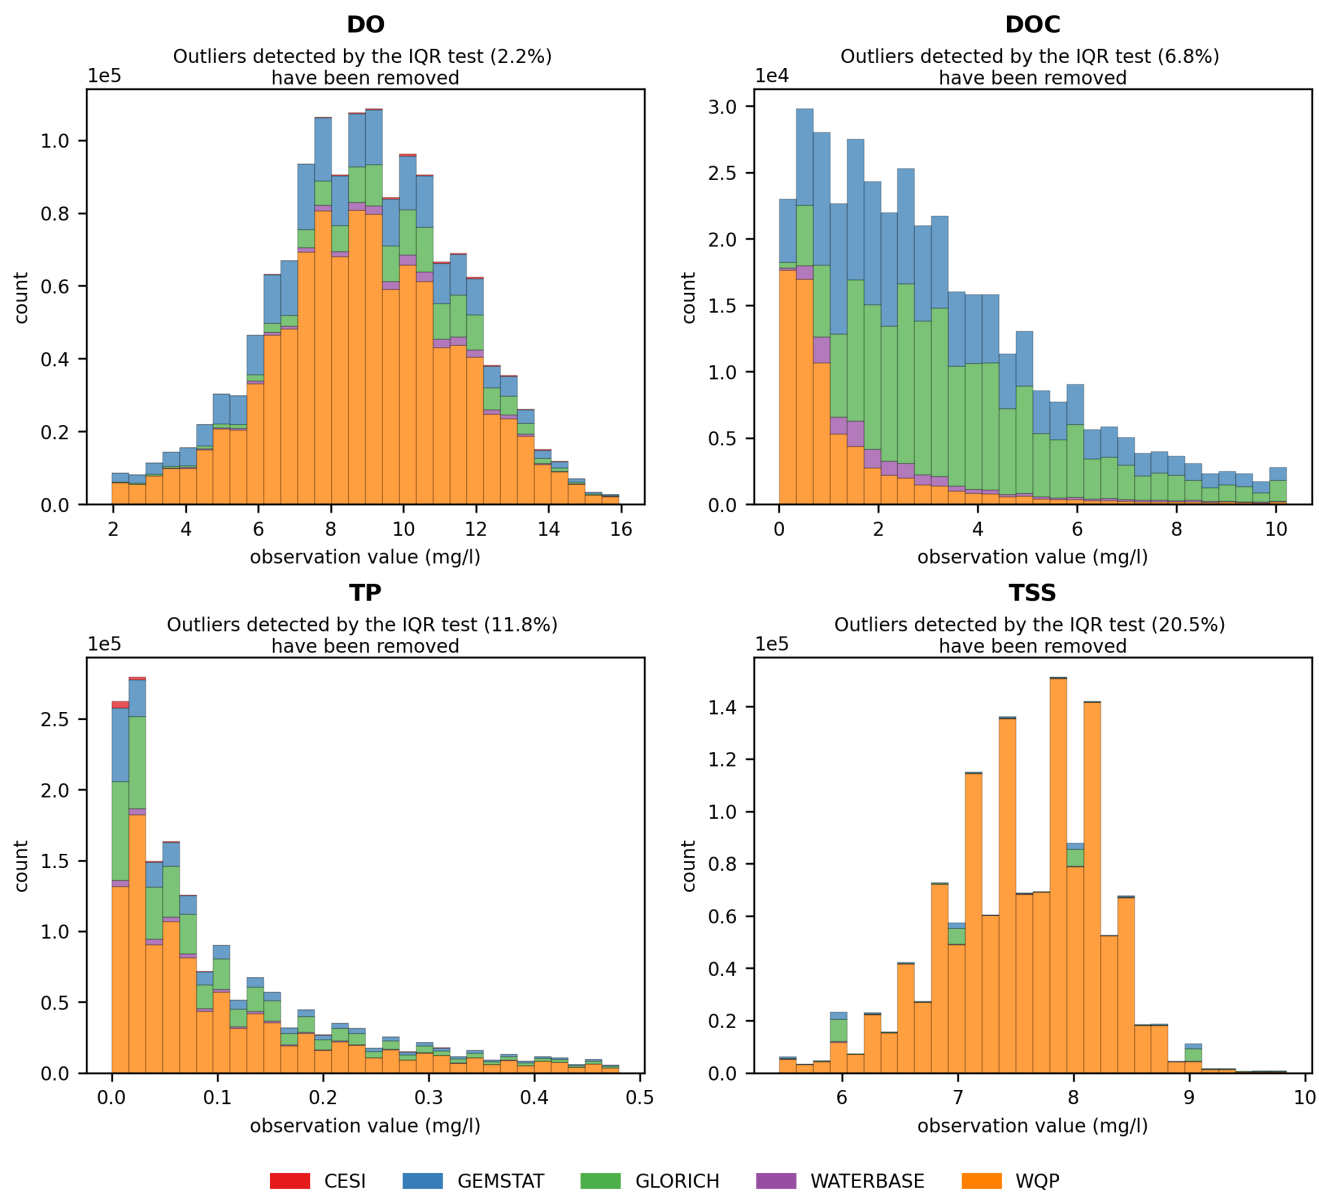

**Figure 3.** Distribution of observation values for dissolved oxygen (DO), dissolved organic carbon (DOC), total phosphorus (TP) and total suspended solids (TSS). Outliers determined by the IQR test (Table 7) are not shown on the plot.



**Table 8.** Summary table of observation time series statistics file attributes.

| Attribute name          | Description                               | Data type |
|-------------------------|-------------------------------------------|-----------|
| source_param_code       | Parameter code in source dataset          | string    |
| param_code              | Parameter code in GRQA                    | string    |
| param_name              | Parameter name in source dataset          | string    |
| source_param_form       | Parameter form in source dataset          | string    |
| param_form              | Parameter form in GRQA                    | string    |
| source_unit             | Parameter unit in source dataset          | string    |
| unit                    | Parameter unit in GRQA                    | string    |
| count                   | Total number of observations              | int       |
| min                     | Minimum observation value                 | float     |
| max                     | Maximum observation value                 | float     |
| mean                    | Mean observation value                    | float     |
| median                  | Median observation value                  | float     |
| std                     | Standard deviation of observation values  | float     |
| min_year                | Time series start                         | int       |
| max_year                | Time series end                           | int       |
| ts_length               | Total time series length per parameter    | float     |
| site_count              | Total number of sites per parameter       | int       |
| mean_obs_count_per_site | Mean observation count per site           | float     |
| mean_ts_length_per_site | Mean time series length in years per site | float     |

315 (mean length per site, etc) is given as well as this can be important when assessing the suitability of the data for modeling purposes.

The applicability of water quality modeling is greatly affected by the distribution of observation values as a majority of modeling methods require a near normal distribution. The skewness caused by extreme outliers is a common problem in hydrological modeling. The observations often follow a lognormal distribution, which means that the data often needs to be transformed and normalized in order to be usable (Helsel, 1987; Hirsch et al., 1982; Parmar and Bhardwaj, 2014). Similar behavior was also examined in GRQA, where values of most parameters showed a strong positive skew. This can be seen in histograms (Fig. 3) and box plots (Fig. A1). For illustrative purposes, values determined as outliers by the IQR test have been omitted from the figures. In the case of parameters such as TP and TSS, the skewness remains even after outlier omission. This is confirmed by the box plots, where the total range of the values greatly exceeds the median.

325 Availability (Fig. 4) and continuity (Fig. 5) plots were used to examine the temporal fragmentation of the time series. In general, observations from national sources (CESI and WQP) exhibited slightly higher availability and continuity than others, likely caused by more consistent data acquisition frameworks. No clear spatial pattern emerged from the analysis meaning that differences in both indicators exist at the site level even within the same country. Due to how the metrics were calculated,

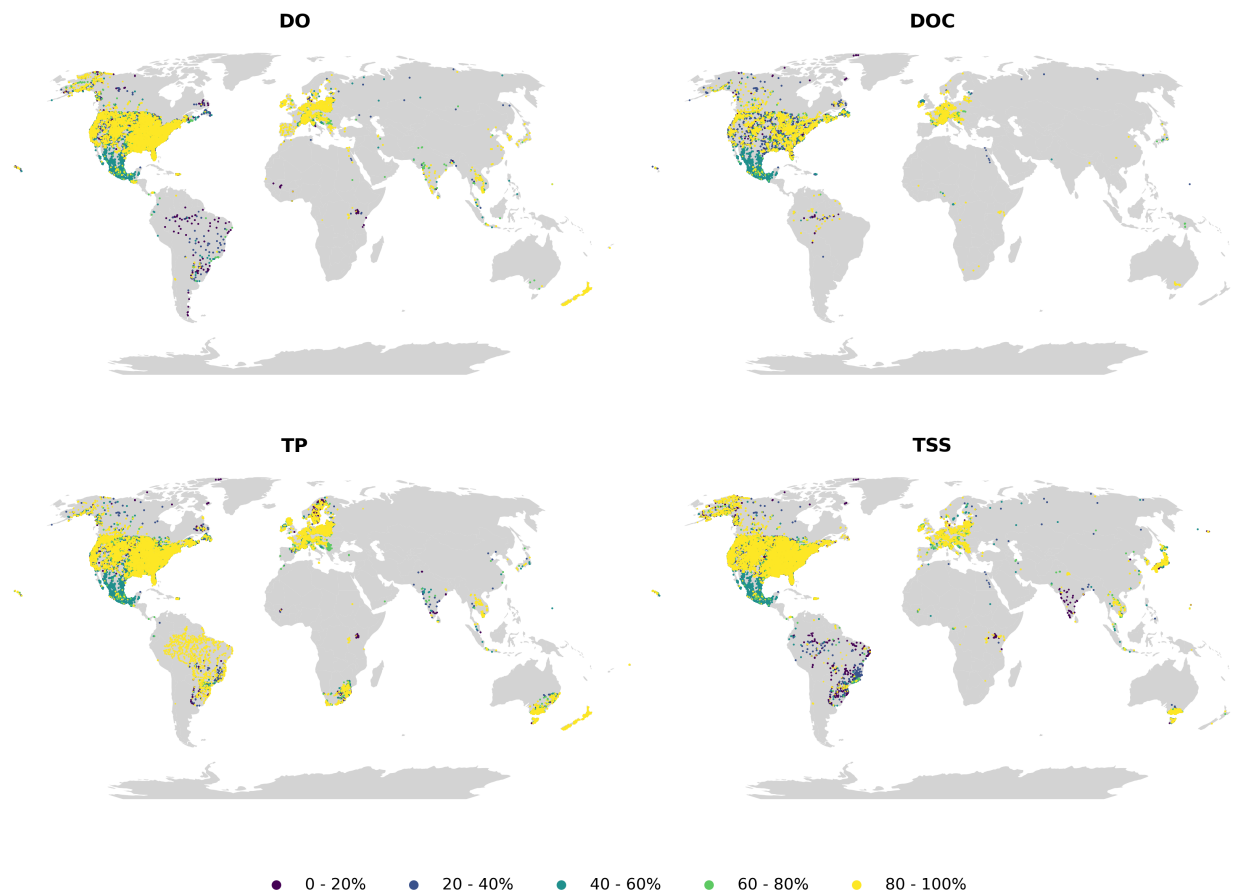

**Figure 4.** Monthly availability for dissolved oxygen (DO), dissolved organic carbon (DOC), total phosphorus (TP) and total suspended solids (TSS).

shorter time series outperformed longer ones. An example of this is TP in Brazil, where the examined high continuity correlated with very short mean time series length (less than a year). Parameters with very fragmented time series (e.g. TSS) had only a limited number of sites where observations had been collected consistently throughout the whole time frame.

The GRQA also includes plots of median observation values, which were calculated over the whole time series for each site. Seasonal fluctuations cannot be identified on this aggregation level, so the maps are meant to be only indicative. An example of median plots can be seen in the appendix (Fig. A2).

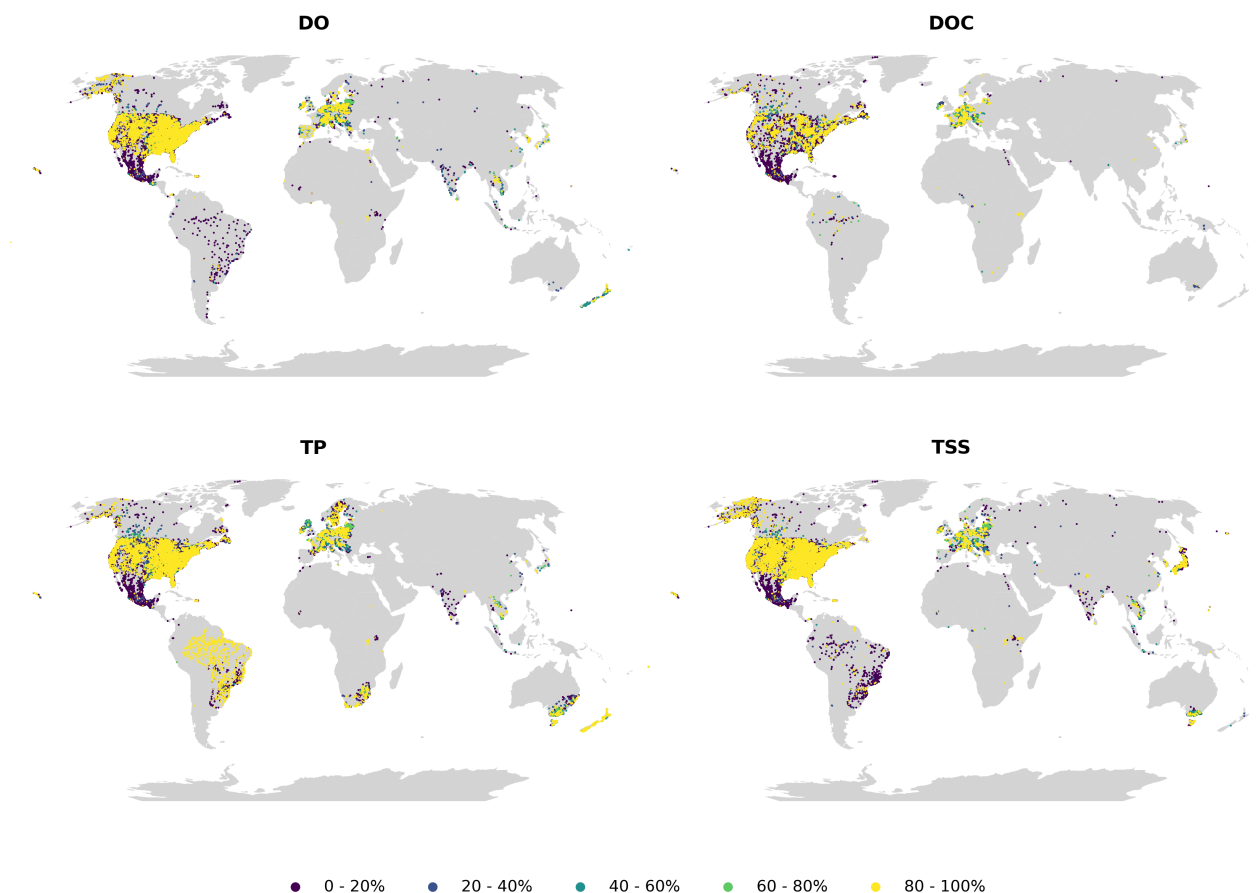

**Figure 5.** Monthly continuity for dissolved oxygen (DO), dissolved organic carbon (DOC), total phosphorus (TP) and total suspended solids (TSS).

## 335 5 Discussion

### 5.1 Limitations and considerations regarding the use of GRQA

Taking into account aforementioned issues encountered during the compilation of GRQA, certain limitations and potential remaining errors have to be considered when using the dataset for water quality modeling.

*Potential errors in unit conversion.* As described in section 3, several assumptions had to be made when creating harmonization schemas about the chemical form of certain nitrogen parameters ( $\text{NO}_2$ ,  $\text{NO}_3$  and  $\text{NH}_4$ ). **However, if the assumption made based on this limited ancillary information was incorrect then using the conversion would have been affected as well.** For this reason, the source observation values along with source units were retained and the users can retrace the conversion steps using the harmonization schemas.

345 *Skewness of observation values.* The outlier treatment strategy used for GRQA involved only flagging the values based on the IQR test, which means that the skewness illustrated in section 4 still remains. Although the described strong positive skew existed also in source data, potential unit conversion errors could have exaggerated it. As shown by histograms, omitting flagged outliers is not enough to eliminate the skewness in some cases (TP and TSS), so additional processing could be needed to transform the data into a normal shape. Power transformation methods like the Box-Cox transformation (Box and Cox, 1964) could be used to further minimize skewness. **It is likely that some of the most extreme outliers are caused by data entry errors or equipment malfunction rather than events such as agricultural spills. For setting thresholds to determine whether a value is illogical or not, more sophisticated outlier detection methods based on some general freshwater quality guidelines (Enderlein et al., 1996) could perhaps be used to further filter the observation values.**

## 5.2 Suggestions for improving multi-source water quality data compilation

365 *Metadata quality.* When merging datasets from different sources, most of the complications stemmed from inadequate metadata of water quality observations, such as ambiguous parameter names and codes, and missing details on the chemical forms of parameters. This information would be integral for harmonizing units and observation values. The terms used for indicating the filtration status of samples are often dependent on the interpretation of the authors (total vs unfiltered, dissolved vs filtered), which can affect results when merging (McMillan et al., 2012; Sprague et al., 2017). Annotation of suspect or incomplete data is another aspect of good quality metadata (Gudivada et al., 2017). Internal quality control measures such as the ones in GEMSTAT and WATERBASE would help the end user in the data cleaning stage and eliminate some of the outliers.

The following aspects should be considered to make multi-source data harmonization more efficient in the future:

- Parameter forms should be reported with the units
- The filtration status of the samples should be reported and the terms filtered/unfiltered should be preferred as opposed to the more ambiguous dissolved/total
- 365 – Machine-readable quality flags as found in GEMSTAT (columns *Value Flags* and *Data Quality*) or WATERBASE (columns *resultObservationStatus*, *metadata\_statusCode* and *metadata\_observationStatus*) should be added
- Whether observations are daily or monthly at the source level should be clearly defined
- Area units (m<sup>2</sup>, km<sup>2</sup>, etc) should be included, when the upstream catchment area of the site is reported
- Other information about potential errors in the data (potential duplicates, typographical errors, etc)
- 370 – When certain assumptions or decisions are made when harmonizing data from different sources, they should be reported when the data is published

*Spatial and temporal discontinuity.* Although spatial coverage of water quality observations in GRQA exceeds that of the existing global datasets (GEMSTAT and GLORICH), large areas of Africa and Asia are empty. A major reason might be a

lack of knowledge and funding to update and extend site networks, particularly in hard to reach areas. In addition, not all  
375 governments adhere to an open data policy. **Therefore, improving the spatial coverage of water quality data still relies mostly  
on implementing additional measures to encourage countries to share it in accordance with open data principles.**

The availability and continuity analysis showed that the GRQA time series are fragmented and significant gaps remain  
in the data, which will negatively affect large-scale modeling performance. These gaps could be caused by both issues with  
sensor maintenance or technical limitations under certain conditions (weather, etc) and inconsistencies in the data acquisition  
380 practices on the local level. Recently, ML based solutions for time series augmentation have been used to fill in gaps in historical  
monitoring data (Gao et al., 2018; Ren et al., 2019). **However, this kind of gap filling still requires enough good quality training  
data in the existing time series fragments to be effective and can potentially only be of help when improving the temporal,  
rather than spatial coverage.**

Another option for improving continuity is using data from one time series to fill in gaps in another. For example, turbidity  
385 has been successfully translated into TP and TSS content (Castrillo and García, 2020; Jones et al., 2011). As turbidity data can  
be acquired at a higher frequency than TP and TSS, the use of such surrogate parameters can be helpful in data scarce regions  
for certain parameters.

*General remarks.* An important part in improving the spatiotemporal coverage of water quality is raising awareness about  
the existing datasets (e.g. GEMSTAT), so that new institutions could join the contributor network and submit their own site  
390 data. Continued growth of international collaboration will be vital in improving open global water quality data (Blöschl et al.,  
2019; Tang et al., 2019). Most of the data collected locally is intended only for regional or national use. Thus, the data is not  
compatible with those from other countries due to lack of common metadata management practices with problems discussed  
above being a major bottleneck (Hutton et al., 2016; Sprague et al., 2017; Stagge et al., 2019). Providing those institutions  
with an example workflow when designing water quality data pipelines, such as the schema recently proposed by Plana et al.  
395 (2019), would help them develop their own data management strategy. The workflow used to compile GRQA along with the  
issues raised in this study will hopefully also help to draw attention to this topic.

## 6 Conclusions

The GRQA dataset was created with the intention to improve the spatiotemporal coverage of previously available open water  
quality data and provide an example workflow for multi-source data compilation that can be accustomed for other data sources  
400 as well. The current version of GRQA is mainly focused on different forms of the main nutrients (N and P) and carbon  
compounds, although GEMSTAT, WATERBASE and WQP also had many other types of parameters that are used as water  
quality indicators (heavy metals, pesticides, etc). Other researchers are able to make additions and customize the dataset to  
their needs for parameter-specific studies using the scripts published with GRQA.

Updates and additions by the hydrological community are encouraged to further develop GRQA. As it stands, GRQA is a  
405 set of well structured CSV files rather than a queryable database. **We intend to add a Jupyter Notebook example of loading  
and processing the CSV files to the GRQA GitHub repository. We included an extensive data catalogue with graphs and maps**

for temporal and spatial coverage of every variable as supplementary material. This should help potential users to get a better overview of the data before downloading it. Converting the files into a database would also greatly improve data management and make extending GRQA easier in the future. In the case of a relational database, the schema recommended by Plana et al. (2019) could be followed. We also consider the addition of an online dashboard for data visualization and download, similar to that of GEMSTAT or WQP. A versioning system along with a metadata validation strategy similar to Welty et al. (2020) could be implemented to ensure metadata quality.

Future work could also include the development of a dataset for catchment characteristics in order to better study how water quality in rivers and streams is affected by land use changes in their catchments. The CAMELS dataset (Addor et al., 2017) and its regional implementations (Chagas et al., 2020; Coxon et al., 2020) can be used as an example. In addition, interactions between water quality and streamflow can be further studied by linking water quality observations to streamflow data from the Global Streamflow Indices and Metadata Archive (GSIM) (Do et al., 2018).

*Code and data availability.* The GRQA dataset, supplementary metadata and figures are available for download on the DataCite and OpenAire enabled Zenodo repository <https://doi.org/10.5281/zenodo.5097436> (Virro et al., 2021). The data processing scripts used for the compilation of GRQA are available on Zenodo <https://doi.org/10.5281/zenodo.5082147> (Virro and Kmoch, 2021).

## **Appendix A: Figures and tables in appendices**

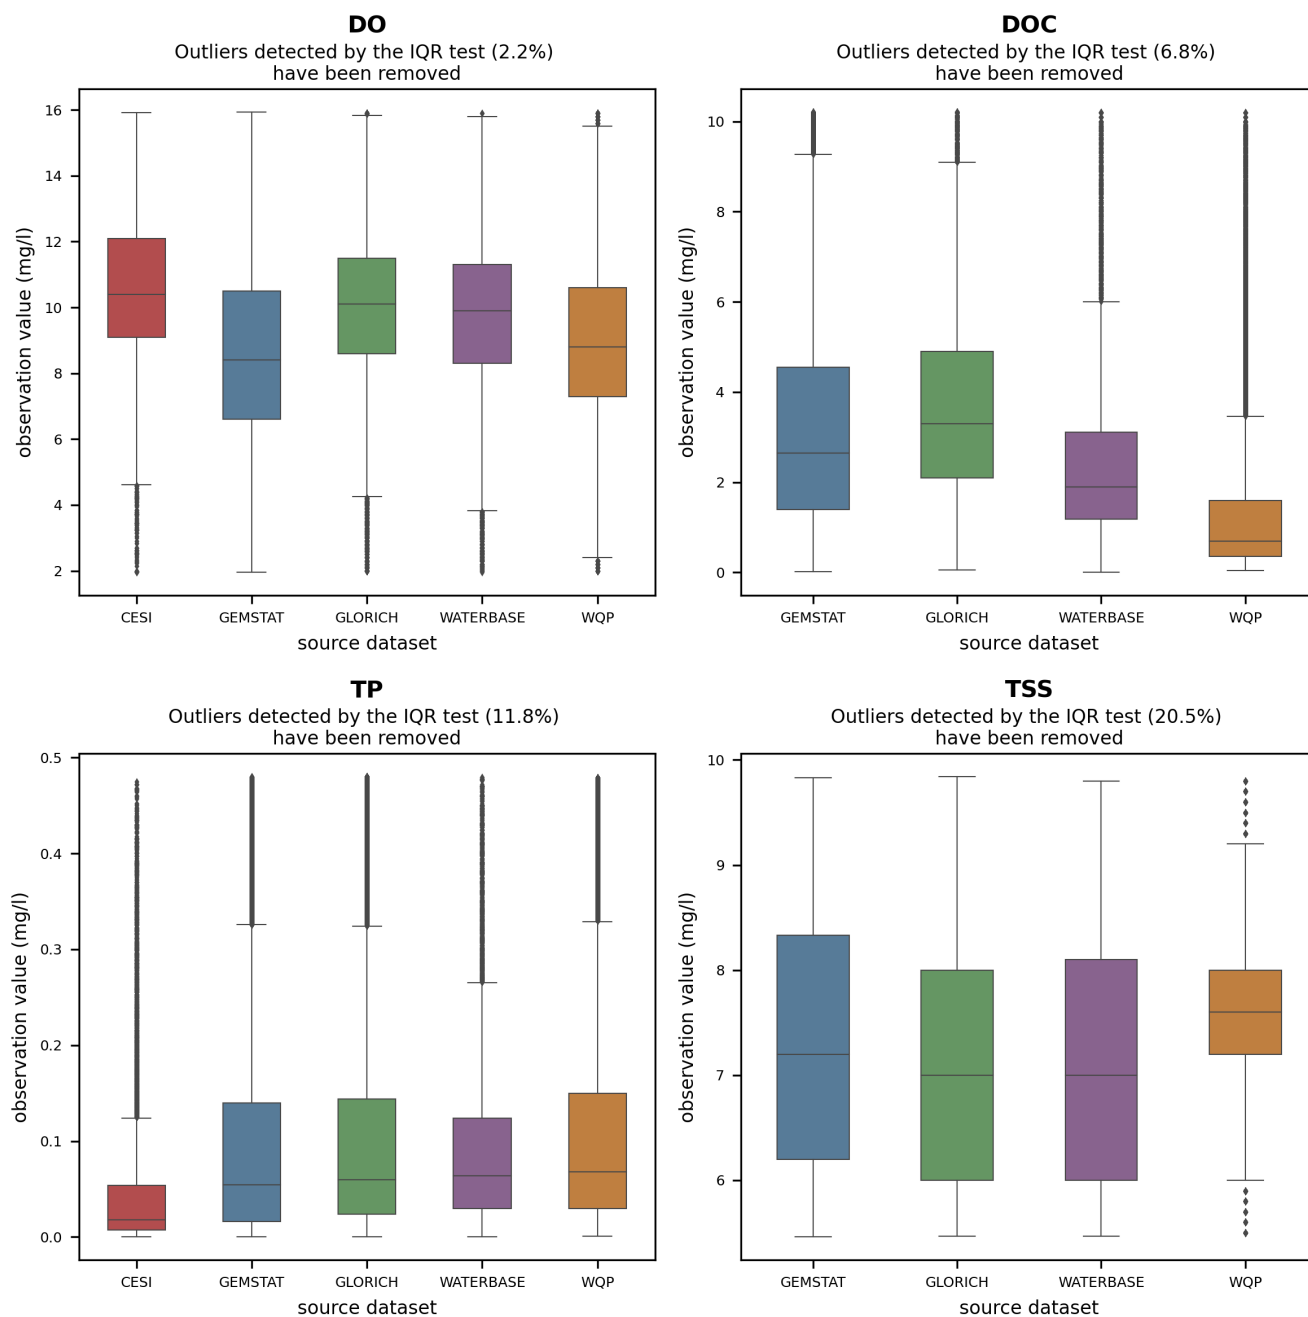

**Figure A1.** Box plot of observation values for dissolved oxygen (DO), dissolved organic carbon (DOC), total phosphorus (TP) and total suspended solids (TSS). Outliers determined by the IQR test (Table 7) are not shown on the plot.

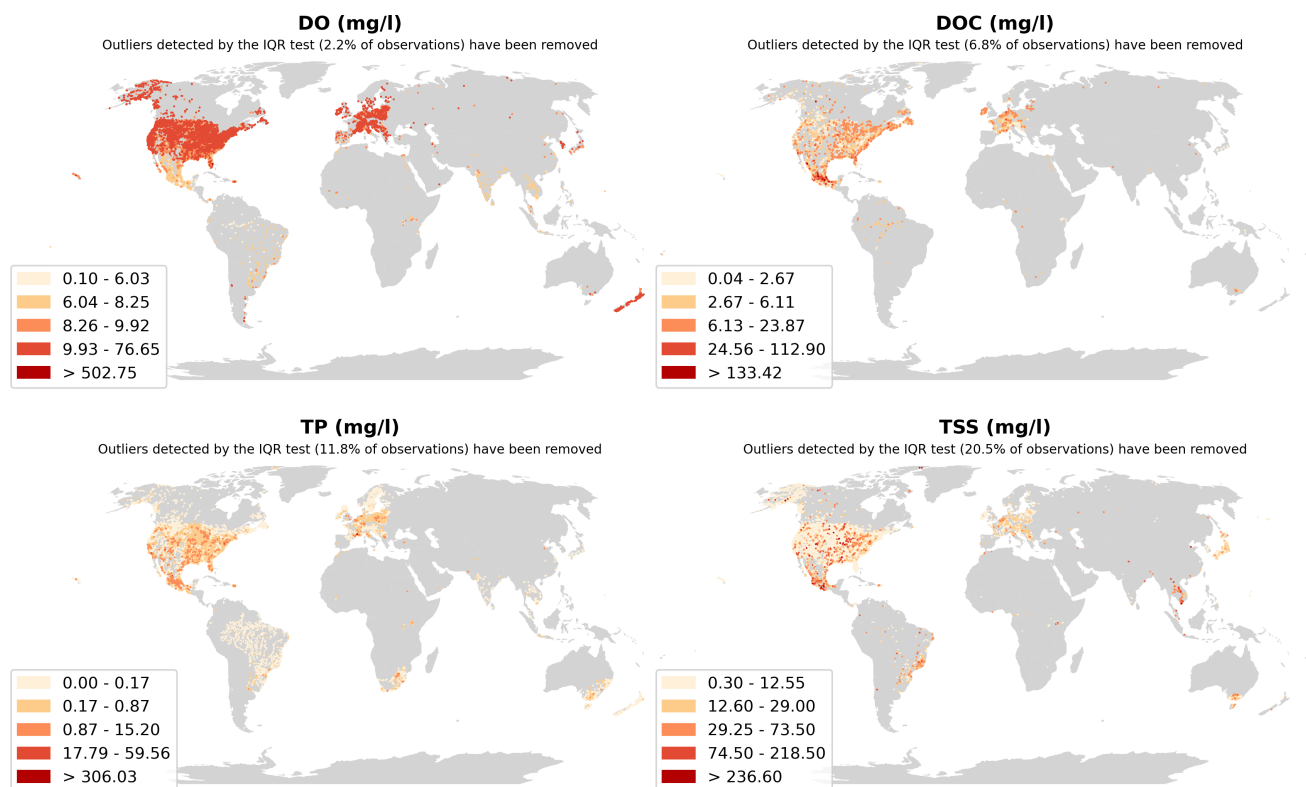

**Figure A2.** Spatial distribution of yearly median observation values for dissolved oxygen (DO), dissolved organic carbon (DOC), total phosphorus (TP) and total suspended solids (TSS). Outliers determined by the IQR test are not shown on the plot.



**Table A1.** Conversion procedures of source data units and chemical forms into their corresponding GRQA versions for all parameters.

| Parameter code | Source  | Form | Source form | Unit  | Source unit     | Divisor | Multiplier | Conversion constant |
|----------------|---------|------|-------------|-------|-----------------|---------|------------|---------------------|
| TAN            | CESI    | N    | NH3         | mg/l  | MG/L            | 17.031  | 14.007     | 0.822441            |
| NO3N           | CESI    | N    | N           | mg/l  | MG/L            | 1       | 1          | 1                   |
| NO2N           | CESI    | N    | N           | mg/l  | MG/L            | 1       | 1          | 1                   |
| TN             | CESI    | N    | N           | mg/l  | MG/L            | 1       | 1          | 1                   |
| TDN            | CESI    | N    | N           | mg/l  | MG/L            | 1       | 1          | 1                   |
| DO             | CESI    | O2   | O2          | mg/l  | MG/L            | 1       | 1          | 1                   |
| pH             | CESI    |      |             | pH    | PH UNITS        | 1       | 1          | 1                   |
| TP             | CESI    | P    | P           | mg/l  | MG/L            | 1       | 1          | 1                   |
| TDP            | CESI    | P    | P           | mg/l  | MG/L            | 1       | 1          | 1                   |
| TEMP           | CESI    |      |             | Deg C | DEG C           | 1       | 1          | 1                   |
| DC             | GEMSTAT | C    | C           | mg/l  | mg/l            | 1       | 1          | 1                   |
| DIC            | GEMSTAT | C    | C           | mg/l  | mg/l            | 1       | 1          | 1                   |
| DOC            | GEMSTAT | C    | C           | mg/l  | mg/l            | 1       | 1          | 1                   |
| POC            | GEMSTAT | C    | C           | mg/l  | $\mu\text{g/g}$ | 1       | 1          | 1                   |
| POC            | GEMSTAT | C    | C           | mg/l  | mg/l            | 1       | 1          | 1                   |
| TC             | GEMSTAT | C    | C           | mg/l  | mg/l            | 1       | 1          | 1                   |
| TIC            | GEMSTAT | C    | C           | mg/l  | mg/l            | 1       | 1          | 1                   |
| TOC            | GEMSTAT | C    | C           | mg/l  | mg/l            | 1       | 1          | 1                   |
| DKN            | GEMSTAT | N    | N           | mg/l  | mg/l            | 1       | 1          | 1                   |
| DON            | GEMSTAT | N    | N           | mg/l  | mg/l            | 1       | 1          | 1                   |
| NH4N           | GEMSTAT | N    | N           | mg/l  | mg/l            | 1       | 1          | 1                   |
| NH4N           | GEMSTAT | N    | NH4         | mg/l  | mg/l NH4        | 18.039  | 14.007     | 0.776484            |
| NH4N           | GEMSTAT | N    | N           | mg/l  | $\mu\text{g/l}$ | 1000    | 1          | 0.001               |
| NO2N           | GEMSTAT | N    | N           | mg/l  | mg/l            | 1       | 1          | 1                   |
| NO2N           | GEMSTAT | N    | NO2         | mg/l  | mg/l NO2        | 46.005  | 14.007     | 0.304467            |
| NO2N           | GEMSTAT | N    | N           | mg/l  | $\mu\text{g/l}$ | 1000    | 1          | 0.001               |
| NO3N           | GEMSTAT | N    | N           | mg/l  | mg/l            | 1       | 1          | 1                   |
| NO3N           | GEMSTAT | N    | NO3         | mg/l  | mg/l NO3        | 62.004  | 14.007     | 0.225905            |
| NO3N           | GEMSTAT | N    | N           | mg/l  | $\mu\text{g/l}$ | 1000    | 1          | 0.001               |
| PN             | GEMSTAT | N    | N           | mg/l  | mg/l            | 1       | 1          | 1                   |
| PON            | GEMSTAT | N    | N           | mg/l  | mg/l            | 1       | 1          | 1                   |
| PON            | GEMSTAT | N    | N           | mg/l  | $\mu\text{g/g}$ | 1       | 1          | 1                   |

425

**Table A1. Continued.**

| Parameter code | Source  | Form | Source form | Unit  | Source unit | Divisor | Multiplier | Conversion constant |
|----------------|---------|------|-------------|-------|-------------|---------|------------|---------------------|
| TDN            | GEMSTAT | N    | N           | mg/l  | mg/l        | 1       | 1          | 1                   |
| TKN            | GEMSTAT | N    | N           | mg/l  | mg/l        | 1       | 1          | 1                   |
| TN             | GEMSTAT | N    | N           | mg/l  | mg/l        | 1       | 1          | 1                   |
| TON            | GEMSTAT | N    | N           | mg/l  | mg/l        | 1       | 1          | 1                   |
| DO             | GEMSTAT | O2   | O2          | mg/l  | mg/l        | 1       | 1          | 1                   |
| DOSAT          | GEMSTAT |      |             | %     | %           | 1       | 1          | 1                   |
| BOD            | GEMSTAT | O2   | O2          | mg/l  | mg/l        | 1       | 1          | 1                   |
| COD            | GEMSTAT | O2   | O2          | mg/l  | mg/l        | 1       | 1          | 1                   |
| pH             | GEMSTAT |      |             | pH    | —           | 1       | 1          | 1                   |
| DIP            | GEMSTAT | P    | P           | mg/l  | mg/l        | 1       | 1          | 1                   |
| TDP            | GEMSTAT | P    | P           | mg/l  | mg/l        | 1       | 1          | 1                   |
| TDP            | GEMSTAT | P    | P           | mg/l  | μg/l        | 1000    | 1          | 0.001               |
| TIP            | GEMSTAT | P    | P           | mg/l  | mg/l        | 1       | 1          | 1                   |
| TP             | GEMSTAT | P    | P           | mg/l  | mg/l        | 1       | 1          | 1                   |
| TP             | GEMSTAT | P    | P           | mg/l  | μg/l        | 1000    | 1          | 0.001               |
| TPP            | GEMSTAT | P    | P           | mg/l  | μg/g        | 1       | 1          | 1                   |
| TPP            | GEMSTAT | P    | P           | mg/l  | mg/l        | 1       | 1          | 1                   |
| TSS            | GEMSTAT |      |             | mg/l  | mg/l        | 1       | 1          | 1                   |
| TEMP           | GEMSTAT |      |             | Deg C | °C          | 1       | 1          | 1                   |
| TEMP           | GLORICH |      |             | Deg C | °C          | 1       | 1          | 1                   |
| pH             | GLORICH |      |             | pH    |             | 1       | 1          | 1                   |
| DO             | GLORICH | O2   | O2          | mg/l  | mg O2 L-1   | 1       | 1          | 1                   |
| DOSAT          | GLORICH |      |             | %     | %           | 1       | 1          | 1                   |
| TSS            | GLORICH |      |             | mg/l  | mg L-1      | 1       | 1          | 1                   |
| TC             | GLORICH | C    | C           | mg/l  | μmol L-1    | 1000    | 12.011     | 0.012011            |
| TIC            | GLORICH | C    | C           | mg/l  | μmol L-1    | 1000    | 12.011     | 0.012011            |
| DIC            | GLORICH | C    | C           | mg/l  | μmol L-1    | 1000    | 12.011     | 0.012011            |
| PIC            | GLORICH | C    | C           | mg/l  | μmol L-1    | 1000    | 12.011     | 0.012011            |
| TOC            | GLORICH | C    | C           | mg/l  | μmol L-1    | 1000    | 12.011     | 0.012011            |
| DOC            | GLORICH | C    | C           | mg/l  | μmol L-1    | 1000    | 12.011     | 0.012011            |
| POC            | GLORICH | C    | C           | mg/l  | μmol L-1    | 1000    | 12.011     | 0.012011            |
| TN             | GLORICH | N    | N           | mg/l  | μmol L-1    | 1000    | 14.007     | 0.014007            |
| TDN            | GLORICH | N    | N           | mg/l  | μmol L-1    | 1000    | 14.007     | 0.014007            |
| PN             | GLORICH | N    | N           | mg/l  | μmol L-1    | 1000    | 14.007     | 0.014007            |

**Table A1. Continued.**

| Parameter code | Source    | Form | Source form | Unit  | Source unit            | Divisor | Multiplier | Conversion constant |
|----------------|-----------|------|-------------|-------|------------------------|---------|------------|---------------------|
| TIN            | GLORICH   | N    | N           | mg/l  | $\mu\text{mol L}^{-1}$ | 1000    | 14.007     | 0.014007            |
| DIN            | GLORICH   | N    | N           | mg/l  | $\mu\text{mol L}^{-1}$ | 1000    | 14.007     | 0.014007            |
| TON            | GLORICH   | N    | N           | mg/l  | $\mu\text{mol L}^{-1}$ | 1000    | 14.007     | 0.014007            |
| DON            | GLORICH   | N    | N           | mg/l  | $\mu\text{mol L}^{-1}$ | 1000    | 14.007     | 0.014007            |
| PON            | GLORICH   | N    | N           | mg/l  | $\mu\text{mol L}^{-1}$ | 1000    | 14.007     | 0.014007            |
| TKN            | GLORICH   | N    | N           | mg/l  | $\mu\text{mol L}^{-1}$ | 1000    | 14.007     | 0.014007            |
| DKN            | GLORICH   | N    | N           | mg/l  | $\mu\text{mol L}^{-1}$ | 1000    | 14.007     | 0.014007            |
| NO3N           | GLORICH   | N    | NO3         | mg/l  | $\mu\text{mol L}^{-1}$ | 1000    | 0.225905   | 0.000226            |
| NO2N           | GLORICH   | N    | NO2         | mg/l  | $\mu\text{mol L}^{-1}$ | 1000    | 0.304467   | 0.000304            |
| NH4N           | GLORICH   | N    | NH4         | mg/l  | $\mu\text{mol L}^{-1}$ | 1000    | 0.776484   | 0.000776            |
| TP             | GLORICH   | P    | P           | mg/l  | $\mu\text{mol L}^{-1}$ | 1000    | 30.973     | 0.030973            |
| TDP            | GLORICH   | P    | P           | mg/l  | $\mu\text{mol L}^{-1}$ | 1000    | 30.973     | 0.030973            |
| TPP            | GLORICH   | P    | P           | mg/l  | $\mu\text{mol L}^{-1}$ | 1000    | 30.973     | 0.030973            |
| TIP            | GLORICH   | P    | P           | mg/l  | $\mu\text{mol L}^{-1}$ | 1000    | 30.973     | 0.030973            |
| DIP            | GLORICH   | P    | P           | mg/l  | $\mu\text{mol L}^{-1}$ | 1000    | 30.973     | 0.030973            |
| NO3N           | WATERBASE | N    | NO3         | mg/l  | mgNO3/L                | 62.004  | 14.007     | 0.225905            |
| NO2N           | WATERBASE | N    | NO2         | mg/l  | mgNO2/L                | 46.005  | 14.007     | 0.304467            |
| NH4N           | WATERBASE | N    | NH4         | mg/l  | mgNH4/L                | 18.039  | 14.007     | 0.776484            |
| NH4N           | WATERBASE | N    | NH3         | mg/l  | mgNH3/L                | 17.031  | 14.007     | 0.822441            |
| NH3N           | WATERBASE | N    | NH3         | mg/l  | mgNH3/L                | 17.031  | 14.007     | 0.822441            |
| NH3N           | WATERBASE | N    | N           | mg/l  | ug/L                   | 1000    | 1          | 0.001               |
| TP             | WATERBASE | P    | P           | mg/l  | mgP/L                  | 1       | 1          | 1                   |
| TSS            | WATERBASE |      |             | mg/l  | mg/L                   | 1       | 1          | 1                   |
| TEMP           | WATERBASE |      |             | Deg C | Cel                    | 1       | 1          | 1                   |
| DOSAT          | WATERBASE |      |             | %     | %                      | 1       | 1          | 1                   |
| DO             | WATERBASE | O2   | O2          | mg/l  | mg/L                   | 1       | 1          | 1                   |
| DO             | WATERBASE | O2   | O2          | mg/l  | mgO2/L                 | 1       | 1          | 1                   |
| BOD5           | WATERBASE | O2   | O2          | mg/l  | mgO2/L                 | 1       | 1          | 1                   |
| BOD7           | WATERBASE | O2   | O2          | mg/l  | mgO2/L                 | 1       | 1          | 1                   |
| CODCr          | WATERBASE | O2   | O2          | mg/l  | mgO2/L                 | 1       | 1          | 1                   |
| CODMn          | WATERBASE | O2   | O2          | mg/l  | mgO2/L                 | 1       | 1          | 1                   |
| DOC            | WATERBASE | C    | C           | mg/l  | mgC/L                  | 1       | 1          | 1                   |
| DOC            | WATERBASE | C    | C           | mg/l  | mg/L                   | 1       | 1          | 1                   |
| TOC            | WATERBASE | C    | C           | mg/l  | mgC/L                  | 1       | 1          | 1                   |

**Table A1. Continued.**

| Parameter code | Source    | Form | Source form | Unit | Source unit | Divisor | Multiplier | Conversion constant |
|----------------|-----------|------|-------------|------|-------------|---------|------------|---------------------|
| TOC            | WATERBASE | C    | C           | mg/l | mg/L        | 1       | 1          | 1                   |
| pH             | WATERBASE |      |             | pH   |             | 1       | 1          | 1                   |
| TKN            | WATERBASE | N    | N           | mg/l | mgN/L       | 1       | 1          | 1                   |
| TKN            | WATERBASE | N    | N           | mg/l | mg/L        | 1       | 1          | 1                   |
| TON            | WATERBASE | N    | N           | mg/l | mgN/L       | 1       | 1          | 1                   |
| PON            | WATERBASE | N    | N           | mg/l | mgN/L       | 1       | 1          | 1                   |
| TIN            | WATERBASE | N    | N           | mg/l | mgN/L       | 1       | 1          | 1                   |
| TN             | WATERBASE | N    | N           | mg/l | mgN/L       | 1       | 1          | 1                   |
| PC             | WQP       | C    | C           | mg/l | mg/l        | 1       | 1          | 1                   |
| DC             | WQP       | C    | C           | mg/l | mg/l        | 1       | 1          | 1                   |
| TC             | WQP       | C    | C           | mg/l | mg/l        | 1       | 1          | 1                   |
| DO             | WQP       | O2   | O2          | mg/l | mg/l        | 1       | 1          | 1                   |
| DOSAT          | WQP       |      |             | %    | % saturatn  | 1       | 1          | 1                   |
| PIC            | WQP       | C    | C           | mg/l | mg/l        | 1       | 1          | 1                   |
| DIC            | WQP       | C    | C           | mg/l | mg/l        | 1       | 1          | 1                   |
| TIC            | WQP       | C    | C           | mg/l | mg/l        | 1       | 1          | 1                   |
| TAN            | WQP       | N    | N           | mg/l | mg/l as N   | 1       | 1          | 1                   |
| TAN            | WQP       | N    | N           | mg/l | mg/l as N   | 1       | 1          | 1                   |
| DIN            | WQP       | N    | N           | mg/l | mg/l as N   | 1       | 1          | 1                   |
| TIN            | WQP       | N    | N           | mg/l | mg/l as N   | 1       | 1          | 1                   |
| NO3N           | WQP       | N    | N           | mg/l | mg/l as N   | 1       | 1          | 1                   |
| NO3N           | WQP       | N    | N           | mg/l | mg/l as N   | 1       | 1          | 1                   |
| NO2N           | WQP       | N    | N           | mg/l | mg/l as N   | 1       | 1          | 1                   |
| NO2N           | WQP       | N    | N           | mg/l | mg/l as N   | 1       | 1          | 1                   |
| PON            | WQP       | N    | N           | mg/l | mg/l        | 1       | 1          | 1                   |
| DON            | WQP       | N    | N           | mg/l | mg/l        | 1       | 1          | 1                   |
| TON            | WQP       | N    | N           | mg/l | mg/l        | 1       | 1          | 1                   |
| POP            | WQP       | P    | P           | mg/l | mg/l as P   | 1       | 1          | 1                   |
| DOP            | WQP       | P    | P           | mg/l | mg/l as P   | 1       | 1          | 1                   |
| TOP            | WQP       | P    | P           | mg/l | mg/l as P   | 1       | 1          | 1                   |
| PN             | WQP       | N    | N           | mg/l | mg/l        | 1       | 1          | 1                   |
| TPP            | WQP       | P    | P           | mg/l | mg/l as P   | 1       | 1          | 1                   |
| TDP            | WQP       | P    | P           | mg/l | mg/l as P   | 1       | 1          | 1                   |
| TP             | WQP       | P    | P           | mg/l | mg/l as P   | 1       | 1          | 1                   |

**Table A1. Continued.**

| Parameter code | Source | Form | Source form | Unit  | Source unit | Divisor | Multiplier | Conversion constant |
|----------------|--------|------|-------------|-------|-------------|---------|------------|---------------------|
| TP             | WQP    | P    | P           | mg/l  | mg/l as P   | 1       | 1          | 1                   |
| TN             | WQP    | N    | N           | mg/l  | mg/l        | 1       | 1          | 1                   |
| TDN            | WQP    | N    | N           | mg/l  | mg/l        | 1       | 1          | 1                   |
| TN             | WQP    | N    | N           | mg/l  | mg/l        | 1       | 1          | 1                   |
| POC            | WQP    | C    | C           | mg/l  | mg/l        | 1       | 1          | 1                   |
| DOC            | WQP    | C    | C           | mg/l  | mg/l        | 1       | 1          | 1                   |
| TOC            | WQP    | C    | C           | mg/l  | mg/l        | 1       | 1          | 1                   |
| BOD5           | WQP    | O2   | O2          | mg/l  | mg/l        | 1       | 1          | 1                   |
| BOD5           | WQP    | O2   | O2          | mg/l  | mg/l        | 1       | 1          | 1                   |
| pH             | WQP    |      |             | pH    | std units   | 1       | 1          | 1                   |
| TSS            | WQP    |      |             | mg/l  | mg/l        | 1       | 1          | 1                   |
| TEMP           | WQP    |      |             | Deg C | deg C       | 1       | 1          | 1                   |

430 *Author contributions.* Holger Virro conceived the manuscript, conducted the data processing and scripting. All authors contributed to the development of the workflow and writing the manuscript.

*Competing interests.* The authors declare no competing interests.

*Acknowledgements.* This research was funded by Mobilitas+ programme grant no. MOBERC34, Marie Skłodowska-Curie Actions individual fellowship under the Horizon 2020 Programme grant agreement number 795625, grant PRG352 from the Estonian Research Council, 435 NUTIKAS programme and the Dora Plus PhD student mobility scholarship number 36.9-6.1/1124 of the Archimedes foundation and European Regional Development Fund (EcolChange Centre of Excellence). Holger Virro is also thankful for technical support from the Yale Center for Research Computing support and the High Performance Computing Center of University of Tartu.

## References

- Abbaspour, K. C., Rouholahnejad, E., Vaghefi, S., Srinivasan, R., Yang, H., and Kløve, B.: A continental-scale hydrology and water quality model for Europe: Calibration and uncertainty of a high-resolution large-scale SWAT model, *Journal of Hydrology*, 524, 733–752, <https://doi.org/10.1016/j.jhydrol.2015.03.027>, <http://www.sciencedirect.com/science/article/pii/S0022169415001985>, 2015.
- Addor, N., Newman, A. J., Mizukami, N., and Clark, M. P.: The CAMELS data set: catchment attributes and meteorology for large-sample studies, *Hydrology and Earth System Sciences (HESS)*, 21, 5293–5313, 2017.
- Archfield, S. A., Clark, M., Arheimer, B., Hay, L. E., McMillan, H., Kiang, J. E., Seibert, J., Hakala, K., Bock, A., Wagener, T., et al.: Accelerating advances in continental domain hydrologic modeling, *Water Resources Research*, 51, 10 078–10 091, 2015.
- Beck, H. E., De Roo, A., and van Dijk, A. I.: Global maps of streamflow characteristics based on observations from several thousand catchments, *Journal of Hydrometeorology*, 16, 1478–1501, 2015.
- Berndt, D. J. and Clifford, J.: Using dynamic time warping to find patterns in time series., in: *KDD workshop*, vol. 10, pp. 359–370, Seattle, WA, USA:, 1994.
- Bierkens, M. F.: Global hydrology 2015: State, trends, and directions, *Water Resources Research*, 51, 4923–4947, 2015.
- Birant, D. and Kut, A.: ST-DBSCAN: An algorithm for clustering spatial–temporal data, *Data & knowledge engineering*, 60, 208–221, 2007.
- Blöschl, G., Bierkens, M. F., Chambel, A., Cudennec, C., Destouni, G., Fiori, A., Kirchner, J. W., McDonnell, J. J., Savenije, H. H., Sivapalan, M., et al.: Twenty-three unsolved problems in hydrology (UPH)—a community perspective, *Hydrological Sciences Journal*, 64, 1141–1158, 2019.
- Börker, J., Hartmann, J., Amann, T., Romero-Mujalli, G., Moosdorf, N., and Jenkins, C.: Chemical river data from drained loess areas, PANGAEA, <https://doi.org/10.1594/PANGAEA.915784>, <https://doi.org/10.1594/PANGAEA.915784>, in: Börker, J et al. (2020): Chemical weathering of loess - GIS data, alkalinity measurements of a loess column experiment in the laboratory under pCO<sub>2</sub> atmospheric and saturated conditions and chemical river data from drained loess areas. PANGAEA, <https://doi.org/10.1594/PANGAEA.915793>, 2020.
- Box, G. E. and Cox, D. R.: An analysis of transformations, *Journal of the Royal Statistical Society: Series B (Methodological)*, 26, 211–243, 1964.
- Caraco, N. F. and Cole, J. J.: Human impact on nitrate export: an analysis using major world rivers, *Ambio*, 28, 167–170, 1999.
- Castrillo, M. and García, Á. L.: Estimation of high frequency nutrient concentrations from water quality surrogates using machine learning methods, *Water Research*, 172, 115 490, 2020.
- Chagas, V. B., Chaffe, P. L., Addor, N., Fan, F. M., Fleischmann, A. S., Paiva, R. C., and Siqueira, V. A.: CAMELS-BR: hydrometeorological time series and landscape attributes for 897 catchments in Brazil, *Earth System Science Data*, 12, 2075–2096, 2020.
- Chau, K.-w.: A review on integration of artificial intelligence into water quality modelling, *Marine pollution bulletin*, 52, 726–733, 2006.
- Chen, J. and Quan, W.: Using Landsat/TM imagery to estimate nitrogen and phosphorus concentration in Taihu Lake, China, *IEEE Journal of Selected Topics in Applied Earth Observations and Remote Sensing*, 5, 273–280, 2011.
- Chen, K., Chen, H., Zhou, C., Huang, Y., Qi, X., Shen, R., Liu, F., Zuo, M., Zou, X., Wang, J., et al.: Comparative analysis of surface water quality prediction performance and identification of key water parameters using different machine learning models based on big data, *Water Research*, 171, 115 454, 2020.
- Choubin, B., Darabi, H., Rahmati, O., Sajedi-Hosseini, F., and Kløve, B.: River suspended sediment modelling using the CART model: a comparative study of machine learning techniques, *Science of the Total Environment*, 615, 272–281, 2018.

- Coxon, G., Addor, N., Bloomfield, J. P., Freer, J., Fry, M., Hannaford, J., Howden, N. J., Lane, R., Lewis, M., Robinson, E. L., et al.: CAMELS-GB: hydrometeorological time series and landscape attributes for 671 catchments in Great Britain, *Earth System Science Data*, 12, 2459–2483, 2020.
- Crochemore, L., Isberg, K., Pimentel, R., Pineda, L., Hasan, A., and Arheimer, B.: Lessons learnt from checking the quality of openly accessible river flow data worldwide, *Hydrological Sciences Journal*, 0, 1–13, <https://doi.org/10.1080/02626667.2019.1659509>, <https://doi.org/10.1080/02626667.2019.1659509>, 2019.
- Desmit, X., Thieu, V., Billen, G., Campuzano, F., Dulière, V., Garnier, J., Lassaletta, L., Ménesguen, A., Neves, R., Pinto, L., et al.: Reducing marine eutrophication may require a paradigmatic change, *Science of the Total Environment*, 635, 1444–1466, 2018.
- Do, H. X., Gudmundsson, L., Leonard, M., and Westra, S.: The Global Streamflow Indices and Metadata Archive (GSIM)-Part 1: The production of a daily streamflow archive and metadata, *Earth System Science Data*, 10, 765–785, 2018.
- Enderlein, R., Enderlein, R., and Williams, W.: Chapter 2\*—Water Quality Requirements, *Water Pollution Control—A Guide to the Use of Water, Quality Management Principles*, 1996.
- Environment and Climate Change Canada: Water quality in Canadian rivers, <https://open.canada.ca/data/en/dataset/55cc50dc-feb3-46d1-b40f-09254f3c00c5>, accessed on November 16, 2020.
- European Environment Agency: Waterbase - Water Quality ICM, <https://www.eea.europa.eu/data-and-maps/data/waterbase-water-quality-icm>, accessed on November 16, 2020.
- Evans, C., Monteith, D., and Cooper, D.: Long-term increases in surface water dissolved organic carbon: observations, possible causes and environmental impacts, *Environmental pollution*, 137, 55–71, 2005.
- Färber, C., Lisniak, D., Saile, P., Kleber, S.-H., Ehl, M., Dietrich, S., Fader, M., and Demuth, S.: Water quality at the global scale: GEMStat database and information system, *EGUGA*, p. 15984, 2018.
- Foley, J. A., Ramankutty, N., Brauman, K. A., Cassidy, E. S., Gerber, J. S., Johnston, M., Mueller, N. D., O’Connell, C., Ray, D. K., West, P. C., et al.: Solutions for a cultivated planet, *Nature*, 478, 337–342, 2011.
- Gao, Y., Merz, C., Lischeid, G., and Schneider, M.: A review on missing hydrological data processing, *Environmental earth sciences*, 77, 47, 2018.
- Gudivada, V., Apon, A., and Ding, J.: Data quality considerations for big data and machine learning: Going beyond data cleaning and transformations, *International Journal on Advances in Software*, 10, 1–20, 2017.
- Gudmundsson, L. and Seneviratne, S. I.: Towards observation-based gridded runoff estimates for Europe, *Hydrology and Earth System Sciences*, 19, 2859–2879, 2015.
- Harrigan, S., Zsoter, E., Alfieri, L., Prudhomme, C., Salamon, P., Wetterhall, F., Barnard, C., Cloke, H., and Pappenberger, F.: GloFAS-ERA5 operational global river discharge reanalysis 1979-present, *Hydrol. Soil Sci. Hydrol*, 2020.
- Harris, C. R., Millman, K. J., van der Walt, S. J., Gommers, R., Virtanen, P., Cournapeau, D., Wieser, E., Taylor, J., Berg, S., Smith, N. J., et al.: Array programming with NumPy, *Nature*, 585, 357–362, 2020.
- Hartmann, J., Lauerwald, R., and Moosdorf, N.: A Brief Overview of the GLObal River Chemistry Database, *GLORICH*, *Procedia Earth and Planetary Science*, 10, 23–27, <https://doi.org/10.1016/J.PROEPS.2014.08.005>, <https://www.sciencedirect.com/science/article/pii/S1878522014000678>, 2014.
- Hartmann, J., Lauerwald, R., and Moosdorf, N.: GLORICH-Global river chemistry database, *PANGAEA* <https://doi.org/10.1594/PANGAEA.902360>, 2019.

- He, B., Kanae, S., Oki, T., Hirabayashi, Y., Yamashiki, Y., and Takara, K.: Assessment of global nitrogen pollution in rivers using an integrated biogeochemical modeling framework, *Water research*, 45, 2573–2586, 2011.
- Helsel, D. R.: Advantages of nonparametric procedures for analysis of water quality data, *Hydrological Sciences Journal*, 32, 179–190, 1987.
- Hirsch, R. M., Slack, J. R., and Smith, R. A.: Techniques of trend analysis for monthly water quality data, *Water resources research*, 18, 107–121, 1982.
- Hope, D., Billett, M., and Cresser, M.: A review of the export of carbon in river water: fluxes and processes, *Environmental pollution*, 84, 301–324, 1994.
- Hrachowitz, M., Savenije, H., Blöschl, G., McDonnell, J., Sivapalan, M., Pomeroy, J., Arheimer, B., Blume, T., Clark, M., Ehret, U., et al.: A decade of Predictions in Ungauged Basins (PUB)—a review, *Hydrological sciences journal*, 58, 1198–1255, 2013.
- Hughes, A. O., Tanner, C. C., McKergow, L. A., and Sukias, J. P.: Unrestricted dairy cattle grazing of a pastoral headwater wetland and its effect on water quality, *Agricultural Water Management*, 165, 72–81, 2016.
- Hutton, C., Wagener, T., Freer, J., Han, D., Duffy, C., and Arheimer, B.: Most computational hydrology is not reproducible, so is it really science?, *Water Resources Research*, 52, 7548–7555, 2016.
- International Centre for Water Resources and Global Change: Global Water Quality Database GEMStat, <https://gemstat.org/data/data-portal/>, accessed on November 16, 2020.
- Jones, A. S., Stevens, D. K., Horsburgh, J. S., and Mesner, N. O.: Surrogate Measures for Providing High Frequency Estimates of Total Suspended Solids and Total Phosphorus Concentrations 1, *JAWRA Journal of the American Water Resources Association*, 47, 239–253, 2011.
- Jordahl, K., den Bossche, J. V., Fleischmann, M., Wasserman, J., McBride, J., Gerard, J., Tratner, J., Perry, M., Badaracco, A. G., Farmer, C., Hjelle, G. A., Snow, A. D., Cochran, M., Gillies, S., Culbertson, L., Bartos, M., Eubank, N., maxalbert, Bilogur, A., Rey, S., Ren, C., Arribas-Bel, D., Wasser, L., Wolf, L. J., Journois, M., Wilson, J., Greenhall, A., Holdgraf, C., Filipe, and Leblanc, F.: geopandas: v0.8.1, <https://doi.org/10.5281/zenodo.3946761>, <https://doi.org/10.5281/zenodo.3946761>, 2020.
- Khan, K., Rehman, S. U., Aziz, K., Fong, S., and Sarasvady, S.: DBSCAN: Past, present and future, in: *The fifth international conference on the applications of digital information and web technologies (ICADIWT 2014)*, pp. 232–238, IEEE, 2014.
- Kratzert, F., Klotz, D., Herrnegger, M., Sampson, A. K., Hochreiter, S., and Nearing, G. S.: Toward improved predictions in ungauged basins: Exploiting the power of machine learning, *Water Resources Research*, 55, 11 344–11 354, 2019.
- Krysanova, V., Müller-Wohlfeil, D.-I., and Becker, A.: Development and test of a spatially distributed hydrological/water quality model for mesoscale watersheds, *Ecological modelling*, 106, 261–289, 1998.
- Leon, L., Soulis, E., Kouwen, N., and Farquhar, G.: Nonpoint source pollution: a distributed water quality modeling approach, *Water Research*, 35, 997–1007, 2001.
- Marzadri, A., Amatulli, G., Tonina, D., Bellin, A., Shen, L. Q., Allen, G. H., and Raymond, P. A.: Global riverine nitrous oxide emissions: the role of small streams and large rivers, *Science of The Total Environment*, p. 145148, 2021.
- McKinney, W. et al.: Data structures for statistical computing in python, in: *Proceedings of the 9th Python in Science Conference*, vol. 445, pp. 51–56, Austin, TX, 2010.
- McMillan, H., Krueger, T., and Freer, J.: Benchmarking observational uncertainties for hydrology: rainfall, river discharge and water quality, *Hydrological Processes*, 26, 4078–4111, 2012.
- Meals, D. W., Dressing, S. A., and Davenport, T. E.: Lag time in water quality response to best management practices: A review, *Journal of environmental quality*, 39, 85–96, 2010.



- Mount, N. J., Maier, H. R., Toth, E., Elshorbagy, A., Solomatine, D., Chang, F.-J., and Abrahart, R.: Data-driven modelling approaches for  
550 socio-hydrology: opportunities and challenges within the Panta Rhei Science Plan, *Hydrological Sciences Journal*, 61, 1192–1208, 2016.
- Mueller, N. D., Gerber, J. S., Johnston, M., Ray, D. K., Ramankutty, N., and Foley, J. A.: Closing yield gaps through nutrient and water  
management, *Nature*, 490, 254–257, 2012.
- Neukermans, G., Ruddick, K., Loisel, H., and Roose, P.: Optimization and quality control of suspended particulate mat-  
ter concentration measurement using turbidity measurements, *Limnology and Oceanography: Methods*, 10, 1011–1023,  
555 <https://doi.org/10.4319/lom.2012.10.1011>, <https://aslopubs.onlinelibrary.wiley.com/doi/abs/10.4319/lom.2012.10.1011>, 2012.
- Olmanson, L. G., Brezonik, P. L., and Bauer, M. E.: Airborne hyperspectral remote sensing to assess spatial distribution of water quality  
characteristics in large rivers: The Mississippi River and its tributaries in Minnesota, *Remote Sensing of Environment*, 130, 254–265,  
2013.
- Ouali, D., Chebana, F., and Ouarda, T. B.: Fully nonlinear statistical and machine-learning approaches for hydrological frequency estimation  
560 at ungauged sites, *Journal of Advances in Modeling Earth Systems*, 9, 1292–1306, 2017.
- Ouyang, W., Yang, W., Tysklind, M., Xu, Y., Lin, C., Gao, X., and Hao, Z.: Using river sediments to analyze the driving force difference for  
non-point source pollution dynamics between two scales of watersheds, *Water research*, 139, 311–320, 2018.
- Papacharalampous, G., Tyralis, H., and Koutsoyiannis, D.: Comparison of stochastic and machine learning methods for multi-step ahead  
forecasting of hydrological processes, *Stochastic Environmental Research and Risk Assessment*, 33, 481–514, 2019.
- 565 Parimala, M., Lopez, D., and Senthilkumar, N.: A survey on density based clustering algorithms for mining large spatial databases, *International Journal of Advanced Science and Technology*, 31, 59–66, 2011.
- Parmar, K. S. and Bhardwaj, R.: Water quality management using statistical analysis and time-series prediction model, *Applied Water  
Science*, 4, 425–434, 2014.
- Pedregosa, F., Varoquaux, G., Gramfort, A., Michel, V., Thirion, B., Grisel, O., Blondel, M., Prettenhofer, P., Weiss, R., Dubourg, V., et al.:  
570 Scikit-learn: Machine learning in Python, the *Journal of machine Learning research*, 12, 2825–2830, 2011.
- Pellerin, B. A., Stauffer, B. A., Young, D. A., Sullivan, D. J., Bricker, S. B., Walbridge, M. R., Clyde Jr, G. A., and Shaw, D. M.: Emerging  
tools for continuous nutrient monitoring networks: Sensors advancing science and water resources protection, *JAWRA Journal of the  
American Water Resources Association*, 52, 993–1008, 2016.
- Plana, Q., Alferes, J., Fuks, K., Kraft, T., Maruéjols, T., Torfs, E., and Vanrolleghem, P. A.: Towards a water quality database for raw and  
575 validated data with emphasis on structured metadata, *Water Quality Research Journal*, 54, 1–9, 2019.
- Radwan, M., Willems, P., El-Sadek, A., and Berlamont, J.: Modelling of dissolved oxygen and biochemical oxygen demand in river water  
using a detailed and a simplified model, *International Journal of River Basin Management*, 1, 97–103, 2003.
- Read, E. K., Carr, L., De Cicco, L., Dugan, H. A., Hanson, P. C., Hart, J. A., Kreft, J., Read, J. S., and Winslow, L. A.: Water quality data for  
national-scale aquatic research: The Water Quality Portal, *Water Resources Research*, 53, 1735–1745, 2017.
- 580 Ren, H., Cromwell, E., Kravitz, B., and Chen, X.: Using deep learning to fill spatio-temporal data gaps in hydrological monitoring networks,  
*Hydrology and Earth System Sciences Discussions*, pp. 1–20, 2019.
- Shen, C., Laloy, E., Elshorbagy, A., Albert, A., Bales, J., Chang, F.-J., Ganguly, S., Hsu, K.-L., Kifer, D., Fang, Z., et al.: HESS Opinions:  
Incubating deep-learning-powered hydrologic science advances as a community, *Hydrology and Earth System Sciences (Online)*, 22,  
2018.
- 585 Shen, L. Q., Amatulli, G., Sethi, T., Raymond, P., and Domisch, S.: Estimating nitrogen and phosphorus concentrations in streams and rivers,  
within a machine learning framework, *Scientific data*, 7, 1–11, 2020.

- Singh, K. P., Basant, A., Malik, A., and Jain, G.: Artificial neural network modeling of the river water quality—a case study, *Ecological Modelling*, 220, 888–895, 2009.
- 590 Sinha, E., Michalak, A., Calvin, K. V., and Lawrence, P. J.: Societal decisions about climate mitigation will have dramatic impacts on eutrophication in the 21 st century, *Nature communications*, 10, 1–11, 2019.
- Snow, A. D., Whitaker, J., Cochran, M., den Bossche, J. V., Mayo, C., de Kloe, J., Karney, C., Ouzounoudis, G., Dearing, J., Lostis, G., Heitor, Filipe, May, R., Itkin, M., Couwenberg, B., Berardinelli, G., Badger, T. G., Eubank, N., Dunphy, M., Brett, M., Raspaud, M., da Costa, M. A., Evers, K., Ranalli, J., de Maeyer, J., Popov, E., Gohlke, C., Willoughby, C., Barker, C., and Wiedemann, B. M.: pyproj4/pyproj: 2.6.1 Release, <https://doi.org/10.5281/zenodo.3783866>, <https://doi.org/10.5281/zenodo.3783866>, 2020.
- 595 Sprague, L. A., Oelsner, G. P., and Argue, D. M.: Challenges with secondary use of multi-source water-quality data in the United States, *Water research*, 110, 252–261, 2017.
- Stagge, J. H., Rosenberg, D. E., Abdallah, A. M., Akbar, H., Attallah, N. A., and James, R.: Assessing data availability and research reproducibility in hydrology and water resources, *Scientific data*, 6, 190030, 2019.
- Strömqvist, J., Arheimer, B., Dahné, J., Donnelly, C., and Lindström, G.: Water and nutrient predictions in ungauged basins: set-up and evaluation of a model at the national scale, *Hydrological Sciences Journal*, 57, 229–247, 2012.
- 600 Tang, T., Stokal, M., van Vliet, M. T., Seuntjens, P., Burek, P., Kroeze, C., Langan, S., and Wada, Y.: Bridging global, basin and local-scale water quality modeling towards enhancing water quality management worldwide, *Current opinion in environmental sustainability*, 36, 39–48, 2019.
- Tilman, D., Fargione, J., Wolff, B., D’antonio, C., Dobson, A., Howarth, R., Schindler, D., Schlesinger, W. H., Simberloff, D., and Swackhamer, D.: Forecasting agriculturally driven global environmental change, *science*, 292, 281–284, 2001.
- 605 Toming, K., Kutser, T., Laas, A., Sepp, M., Paavel, B., and Nöges, T.: First experiences in mapping lake water quality parameters with Sentinel-2 MSI imagery, *Remote Sensing*, 8, 640, 2016.
- UN-Water: Summary Progress Update 2021: SDG 6 — water and sanitation for all, <https://www.unwater.org/publications/summary-progress-update-2021-sdg-6-water-and-sanitation-for-all/>, 2021.
- 610 United States Geological Survey: Water Quality Portal, <https://www.waterqualitydata.us/portal/>, accessed on November 16, 2020.
- Virro, H. and Knoch, A.: GRQA code supplement, <https://doi.org/10.5281/zenodo.5082147>, <https://doi.org/10.5281/zenodo.5082147>, 2021.
- Virro, H., Amatulli, G., Knoch, A., Shen, L., and Uemaa, E.: Global River Water Quality Archive (GRQA), <https://doi.org/10.5281/zenodo.5097436>, <https://doi.org/10.5281/zenodo.5097436>, 2021.
- Wellen, C., Kamran-Disfani, A.-R., and Arhonditsis, G. B.: Evaluation of the current state of distributed watershed nutrient water quality modeling, *Environmental science & technology*, 49, 3278–3290, 2015.
- 615 Welty, E., Zemp, M., Navarro, F., Huss, M., Fürst, J. J., Gärtner-Roer, I., Landmann, J., Machguth, H., Naegeli, K., Andreassen, L. M., et al.: Worldwide version-controlled database of glacier thickness observations, *Earth System Science Data*, 12, 3039–3055, 2020.
- Wilkinson, M. D., Dumontier, M., Aalbersberg, I. J., Appleton, G., Axton, M., Baak, A., Blomberg, N., Boiten, J.-W., da Silva Santos, L. B., Bourne, P. E., et al.: The FAIR Guiding Principles for scientific data management and stewardship, *Scientific data*, 3, 1–9, 2016.
- 620 Wood, E. F., Roundy, J. K., Troy, T. J., Van Beek, L., Bierkens, M. F., Blyth, E., de Roo, A., Döll, P., Ek, M., Famiglietti, J., et al.: Hyperresolution global land surface modeling: Meeting a grand challenge for monitoring Earth’s terrestrial water, *Water Resources Research*, 47, 2011.
- Wu, Y. and Chen, J.: Investigating the effects of point source and nonpoint source pollution on the water quality of the East River (Dongjiang) in South China, *Ecological Indicators*, 32, 294–304, 2013.

- 625 Xu, X., Ester, M., Kriegel, H.-P., and Sander, J.: A distribution-based clustering algorithm for mining in large spatial databases, in: Proceedings 14th International Conference on Data Engineering, pp. 324–331, IEEE, 1998.
